# Supplementary material for: A thiolated copper-hydride nanocluster with chloride bridging as a catalyst for carbonylative C–N coupling of aryl amines under mild conditions: a combined experimental and theoretical study
Source: Royal Society of Chemistry journal article supplement (doi:10.1039/d3nr05912j), 2024-01-01
Supplement: d3nr05912j1.pdf [file d3nr05912j1.pdf]

## Supporting Information

# **A thiolated copper-hydride nanocluster with chloride bridging as a catalyst for carbonylative C–N coupling of aryl amines under mild conditions: a combined experimental and theoretical study**

Anish Kumar Das,<sup>[a]‡</sup> Sourav Biswas,<sup>[a]‡</sup> Amit Pal,<sup>[a]</sup> Surya Sekhar Manna,<sup>[b]</sup> Avirup Sardar,<sup>[a]</sup> Pradip Kumar Mondal,<sup>[c]</sup> Basudev Sahoo,<sup>\*[a]</sup> Biswarup Pathak,<sup>\*[b]</sup> and Sukhendu Mandal<sup>\*[a]</sup>

<sup>[a]</sup>School of Chemistry, Indian Institute of Science Education and Research Thiruvananthapuram, Kerala 695551, India. E-mail: [sukhendu@iisertvm.ac.in](mailto:sukhendu@iisertvm.ac.in)

<sup>[b]</sup> Department of Chemistry, Indian Institute of Technology Indore, Madhya Pradesh 453552, India

<sup>[c]</sup> Elettra-Sincrotrone Trieste, S.S. 14 Km 163.5 in Area Science Park, Basovizza, Italy

<sup>‡</sup>These authors contributed equally.

## Table of contents

| Name        | Description                                                                                                                                                                                                                                                                                                       | Page No. |
|-------------|-------------------------------------------------------------------------------------------------------------------------------------------------------------------------------------------------------------------------------------------------------------------------------------------------------------------|----------|
|             | Experimental section                                                                                                                                                                                                                                                                                              | S3-S13   |
| Table S1    | Crystal data and structure refinement parameters                                                                                                                                                                                                                                                                  | S14      |
| Table S2    | Position of ten hydrides in the Cu <sub>29</sub> NC                                                                                                                                                                                                                                                               | S15      |
| Table S3    | Theoretical insights into the mechanism of the catalysis reaction                                                                                                                                                                                                                                                 | S16      |
| Fig. S1     | SEM and optical microscope images of Cu <sub>29</sub> crystals                                                                                                                                                                                                                                                    | S17      |
| Fig. S2     | <sup>1</sup> H NMR of Cu <sub>29</sub> NC                                                                                                                                                                                                                                                                         | S18      |
| Fig. S3     | <sup>1</sup> H NMR of Cu <sub>29</sub> D NC,                                                                                                                                                                                                                                                                      | S19      |
| Figs. S4-S6 | <sup>11</sup> B, <sup>19</sup> F, <sup>31</sup> P NMR of Cu <sub>29</sub> NC                                                                                                                                                                                                                                      | S20-S22  |
| Fig. S7     | (a) $\mu_2$ and $\mu_3$ bridging modes of Cl <sup>-</sup> in the shell of the Cu <sub>29</sub> NC, and (b) $\mu_3$ bridging modes of Cl <sup>-</sup> in the shell of the reported [Cu <sub>29</sub> (SAdm) <sub>15</sub> Cl <sub>3</sub> (P(Ph-Cl) <sub>3</sub> ) <sub>4</sub> H <sub>10</sub> ] <sup>+</sup> NC. | S23      |
| Fig. S8     | Positive mode ESI-MS spectrum of Cu <sub>29</sub> NC                                                                                                                                                                                                                                                              | S24      |
| Fig. S9     | XPS survey spectrum of Cu <sub>29</sub> NC                                                                                                                                                                                                                                                                        | S25      |
| Fig. S10    | Energy dispersive spectrum of Cu <sub>29</sub> NC                                                                                                                                                                                                                                                                 | S26      |
| Fig. S11    | High-resolution XPS spectra of each element                                                                                                                                                                                                                                                                       | S27      |
| Fig. S12    | Cu LMM auger spectrum of Cu <sub>29</sub> NC                                                                                                                                                                                                                                                                      | S28      |
| Fig. S13    | Stability of as-synthesized Cu <sub>29</sub> NC, after exposing to sunlight for 4 hours and after 7 days at ambient conditions                                                                                                                                                                                    | S29      |
| Fig. S14    | TEM analysis before and after the catalytic reaction                                                                                                                                                                                                                                                              | S30      |
| Fig. S15    | Comparison of UV-vis data between the pure catalyst and isolated catalyst dissolved in chloroform                                                                                                                                                                                                                 | S31      |
| Fig. S16    | ESI-MS data of the pure catalyst and the isolated catalyst from the catalytic reaction mixture                                                                                                                                                                                                                    | S32      |
| Fig. S17    | <sup>1</sup> H NMR of the isolated catalyst after the catalytic reaction                                                                                                                                                                                                                                          | S33      |
|             | NMR spectra                                                                                                                                                                                                                                                                                                       | S34-S46  |
|             | XYZ coordinates of the optimized structure                                                                                                                                                                                                                                                                        | S47-S53  |
|             | References                                                                                                                                                                                                                                                                                                        | S54      |

## Experimental

### Materials

Tetrakis(acetonitrile)copper(I) tetrafluoroborate  $\text{Cu}(\text{CH}_3\text{CN})_4\text{BF}_4$ , triphenylphosphine ( $\text{PPh}_3$ ), tert-butylthiol ( $\text{HS}^t\text{Bu}$ ), sodium borohydride ( $\text{NaBH}_4$ ), sodium borodeuteride ( $\text{NaBD}_4$ ) were procured from Sigma-Aldrich. All the reagents used for the catalysis reaction were also obtained from Sigma-Aldrich. HPLC grade solvents- chloroform, acetonitrile, methanol, and n-hexane were purchased from Spectrochem. Milli-Q water was utilized throughout the experiments.

### Synthesis of $[\text{Cu}_{29}(\text{S}^t\text{Bu})_{12}(\text{PPh}_3)_4\text{Cl}_6\text{H}_{10}][\text{BF}_4] \text{NC}$

Initially, 50 mg (0.16 mmol) of  $\text{Cu}(\text{CH}_3\text{CN})_4\text{BF}_4$  and 50 mg (0.19 mmol) of  $\text{PPh}_3$  were mixed in the mixture solution of 2 mL acetonitrile and 0.5 mL chloroform at room temperature and stirred until a clear solution was obtained. After that, 14  $\mu\text{L}$  (0.12 mmol) of  $\text{HS}^t\text{Bu}$  was added to the mixture and continued stirring. After 15 min of stirring, 50 mg (1.32 mmol) of  $\text{NaBH}_4$  dissolved in 2.5 mL methanol was added into the mixture, and a red color solution was formed. Then the reaction was kept for another 1 h under continuous stirring. After completion, the reaction mixture was centrifuged, and the red precipitate was formed. After drying properly, the precipitate was dissolved in the solvent mixture of chloroform/hexane (volume ratio 1:1). The final clear solution was kept for crystallization at ambient conditions. After 7 days, red-colored plate-like crystals were obtained.

### Synthesis of $[\text{Cu}_{29}(\text{S}^t\text{Bu})_{12}(\text{PPh}_3)_4\text{Cl}_6\text{D}_{10}]^+ (\text{Cu}_{29}\text{D}) \text{NC}$

The same procedure was adopted, whatever was mentioned for the synthesis of the  $\text{Cu}_{29} \text{NC}$ . Instead of  $\text{NaBH}_4$ , we have used  $\text{NaBD}_4$  as a reducing agent.

### The general procedure of the catalytic reactions: $\text{Cu}_{29}$ -nanocluster catalyzed carbamate formation from substituted Anilines and Benzimidazole (GP 1)

In an oven-dried screw cap vial equipped with a Teflon-coated stirring bar, Aniline 1 (0.2 mmol, 1.0 equiv.), Dialkylazodicarboxylate (2) (0.4 mmol, 2.0 equiv.),  $\text{Cu}_{29}$ -nanocluster (0.46  $\mu\text{mol}$ , 0.0023 equiv.) were dissolved in dry  $\text{CDCl}_3$  (0.3 M) under an inert atmosphere. The

reaction mixture was stirred at room temperature for 3 h. The reaction was monitored by checking TLC, and upon completion, the reaction was quenched by adding water and extracted with dichloromethane. The combined organic layers were washed once again with water (5 mL), followed by brine (5 mL), and the solvents were removed under reduced pressure. The crude reaction mixture was purified by using flash column chromatography through silica gel (eluent: ethyl acetate/ petroleum ether) to afford pure product 3.

### **X-ray Crystallography details**

Single-crystal data of red-colored plate-like Cu<sub>29</sub> NC was collected on a Bruker Axs Kappa Apex II SCXRD (single crystal X-ray diffractometer) with CCD detector (MoK $\alpha$  radiation,  $\lambda=0.71073$  Å) at the temperature of 100 K. Using Olex2,<sup>S1</sup> the structure was solved with the SHELXT<sup>S2</sup> structure solution program using Intrinsic Phasing and refined with the SHELXL<sup>S3</sup> refinement package using Least Squares minimization. *PLATON SQUEEZE*<sup>S4</sup> was applied during the final refinements to remove density mess from randomly oriented solvent molecules. All non-hydrogen atoms were refined anisotropically and hydrogen atoms were (positioned geometrically) refined isotropically using an olex2.<sup>S1</sup> We have successfully assigned the position and the number of hydrides in the structure by cautious SCXRD measurements.

Note: The finding of the hydrides is really a challenge because of the high electron density around the copper core compared to the low electron density of the hydrides and the hydrides are almost transparent to X-rays.<sup>S5</sup>

### **Computational details**

All the calculations of Cu<sub>29</sub> NC were carried out using the Vienna ab Initio Simulation Package (VASP) with projector augmented wave (PAW) method.<sup>S6-S9</sup> Generalized gradient approximations of Perdew–Burke–Ernzerhof (GGA-PBE) was used for describing the exchange-correlation interactions.  $\Gamma$ -Point was used to sample the Brillouin zone. An energy convergence criterion of  $10^{-5}$  eV and force convergence criteria of 0.05 eV were employed. The DFT-D3 method was used for treating dispersion interactions of Cu<sub>29</sub> NC. Moreover, more than 10 Å vacuum has been added in all three directions to avoid any periodic image interactions. Climbing image nudged elastic band (CI-NEB) with six images and dimer method was used for transition state analysis. The transition state is confirmed by the presence of one and only imaginary frequency.

The time-dependent density functional theory (TDDFT) calculations of Cu<sub>29</sub> NC involving 300 excited states are carried out using Gaussian 09 Package with B3LYP functional and 6-31G\* basis set.<sup>S10-S12</sup> LANL2DZ effective core potential is used for Cu atom.<sup>S13,S14</sup> The ligands are simplified to methyl for reducing computational expenditure in the structural calculations. Chloroform solvent was used under the conductor-like polarizable continuum solvation model (CPCM).

## **Instrumentation**

A SHIMADZU UV-3800 spectrometer was used for measuring the absorbance spectra. FEI Tecnai G2 F30 S -Twin transmission electron microscope (TEM) 300 kV, scanning electron microscope (SEM), and energy-dispersive X-ray spectroscopy (EDS; FEI Nova NANOSEM 450) were used for the microscopic characterization. X-ray photoelectron spectroscopy (XPS) measurement has been done by using the Omicron Nanotech instrument (MgK<sub>α</sub> radiation at 1253.6 eV). All binding energies were referenced to the neutral C 1s peak at 284.8 eV. Bruker Avance III, 500 MHz, NMR was used for the <sup>1</sup>H, <sup>11</sup>B, <sup>13</sup>C, <sup>19</sup>F and <sup>31</sup>P studies. Waters Q-TOF mass spectrometer equipped with a Z-spray source was used for the electrospray ionization (ESI) mass spectrometry measurement in positive mode. Samples were dissolved in chloroform (1 mg/mL) and diluted by methanol (1:1). The solution was infused at 160 μL/min. The spectrometer was operated in the mass range of m/z 2000–10000, capillary voltage was 4.65 kV, sampling cone 80 V, source temperature 80 °C, source offset 28 V, desolvation temperature 150 °C, cone gas flow 179 L/Hr, desolvation gas flow 740 L/Hr. For the isolated catalyst, the parameters: capillary voltage 3.3 kV, sampling cone 60 V, source temperature 70 °C, source offset 10 V, desolvation temperature 400 °C, cone gas flow 50 L/Hr, desolvation gas flow 200 L/Hr.

## Variation of Anilines

### Isopropyl phenylcarbamate (**3aa**):

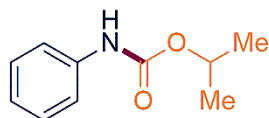

Following **GP 1**, the starting materials **1a** (0.2 mmol) and **2a** (0.4 mmol) afforded the compound **3aa**, as a white solid (25.4 mg, 0.142 mmol, 71%).

$^1\text{H NMR}$  (500 MHz,  $\text{CDCl}_3$ )  $\delta$  (ppm) = 7.37 (d,  $J = 7.7$  Hz, 2H), 7.30 (t,  $J = 6.9$  Hz, 2H), 7.05 (t,  $J = 7.3$  Hz, 1H), 6.52 (s, 1H), 5.06-4.98 (m, 1H), 1.30 (d,  $J = 6.3$  Hz, 6H); The spectroscopic data obtained were in agreement with the reported data for the compound **3aa**.<sup>S15</sup>

### Isopropyl *p*-tolylcarbamate (**3ba**):

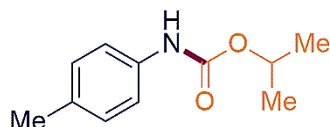

Following **GP1**, the starting materials **1b** (0.2 mmol) and **2a** (0.4 mmol) afforded the compound **3ba**, as a white solid (26.6 mg, 0.138 mmol, 69%).

$^1\text{H NMR}$  (500 MHz,  $\text{CDCl}_3$ )  $\delta$  (ppm) = 7.13 (d,  $J = 7.8$  Hz, 2H), 7.10 (d,  $J = 8.6$  Hz, 2H), 6.45 (s, 1H), 5.03-4.98 (m, 1H), 2.30 (s, 3H), 1.29 (d,  $J = 6.3$  Hz, 6H); The spectroscopic data obtained were in agreement with the reported data for the compound **3ba**.<sup>S15</sup>

### Isopropyl (4-(*tert*-butyl)phenyl)carbamate (**3ca**):

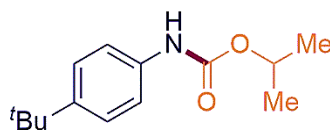

Following **GP1**, the starting materials **1c** (0.2 mmol) and **2a** (0.4 mmol) afforded the compound **3ca**, as a white solid (32 mg, 0.136 mmol, 68%).

$^1\text{H NMR}$  (500 MHz,  $\text{CDCl}_3$ )  $\delta$  (ppm) = 7.31-7.33 (m, 4H), 6.47 (s, 1H), 4.98-5.05 (m, 1H), 1.58 (s, 9H), 1.29 (d,  $J = 5.5$  Hz, 6H).; The spectroscopic data obtained were in agreement with the reported data for the compound **3ca**.<sup>S16</sup>

### Isopropyl (3,5-dimethylphenyl)carbamate (**3da**):

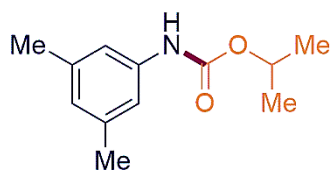

Following **GP1**, the starting materials **1d** (0.2 mmol) and **2a** (0.4 mmol) afforded the compound **3da**, as a colourless liquid (28.6 mg, 0.138 mmol, 69%).

$^1\text{H NMR}$  (500 MHz,  $\text{CDCl}_3$ )  $\delta$  (ppm) = 7.01 (s, 2H), 6.70 (s, 1H), 6.42 (s, 1H), 4.96-5.03 (m, 1H), 2.28 (s, 6H), 1.29 (d,  $J = 6.3$  Hz, 6H); The spectroscopic data obtained were in agreement with the reported data for the compound **3da**.<sup>S15</sup>

### Isopropyl (4-chlorophenyl)carbamate (**3ea**):

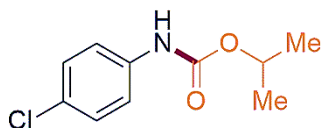

Following **GP1**, the starting materials **1e** (0.2 mmol) and **2a** (0.4 mmol) afforded the compound **3ea**, as a white solid (27.8 mg, 0.13 mmol, 65%).

$^1\text{H NMR}$  (500 MHz,  $\text{CDCl}_3$ )  $\delta$  (ppm) = 7.18 (d,  $J = 8.8$  Hz, 2H), 7.16 (d,  $J = 8.8$  Hz, 2H), 6.48 (s, 1H), 4.89-4.97 (m, 1H), 1.22 (d,  $J = 6.3$  Hz, 6H); The spectroscopic data obtained were in agreement with the reported data for the compound **3ea**.<sup>S15</sup>

### Isopropyl (4-bromophenyl)carbamate (**3fa**):

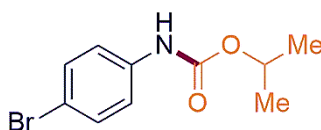

Following **GP1**, the starting materials **1f** (0.2 mmol) and **2a** (0.4 mmol) afforded the compound **3fa**, as a white solid (31.87 mg, 0.12 mmol, 62%).

$^1\text{H NMR}$  (500 MHz,  $\text{CDCl}_3$ )  $\delta$  (ppm) = 7.48 (d,  $J = 8.8$  Hz, 2H), 7.39 (d,  $J = 8.8$  Hz, 2H), 6.57 (s, 1H), 4.97-5.05 (m, 1H), 1.29 (d,  $J = 6.3$  Hz, 6H); The spectroscopic data obtained were in agreement with the reported data for the compound **3fa**.<sup>S15</sup>

### Isopropyl pyridin-2-ylcarbamate (**3ga**):

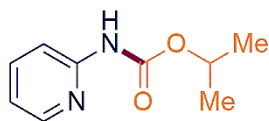

Following **GP1**, the starting materials **1g** (0.2 mmol) and **2a** (0.4 mmol) afforded the compound **3ga**, as a white solid (16.94 mg, 0.094 mmol, 47%).

$^1\text{H NMR}$  (500 MHz,  $\text{CDCl}_3$ )  $\delta$  (ppm) = 8.29 (s, 1H), 7.98 (d,  $J$  = 8.5 Hz, 1 H), 7.66-7.70 (m, 1H), 6.96-6.99 (m, 1H), 5.01-5.08 (m, 1H), 1.32 (d,  $J$  = 6.3 Hz, 6H); The spectroscopic data obtained were in agreement with the reported data for the compound **3ga**.<sup>S15</sup>

### Variation of Dialkylazodicarboxylate

#### Ethyl phenylcarbamate (**3ab**):

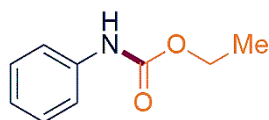

Following **GP1**, the starting materials **1a** (0.2 mmol) and **2b** (0.4 mmol) afforded the compound **3ab**, as a white solid (25.77 mg, 0.156 mmol, 78%).

$^1\text{H NMR}$  (500 MHz,  $\text{CDCl}_3$ )  $\delta$  (ppm) = 7.31 (d,  $J$  = 8.2 Hz, 2H), 7.23 (t,  $J$  = 7.9 Hz, 2H), 6.99 (t,  $J$  = 7.4 Hz, 1H), 6.52 (s, 1H), 4.13-4.18 (q,  $J$  = 7.2 Hz, 2H), 1.24 (t,  $J$  = 7.2 Hz, 3H); The spectroscopic data obtained were in agreement with the reported data for the compound **3ab**.<sup>S17</sup>

#### *tert*-butyl phenylcarbamate (**3ac**):

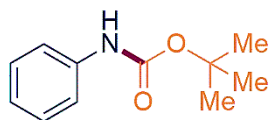

Following **GP1**, the starting materials **1a** (0.2 mmol) and **2c** (0.4 mmol) afforded the compound **3ac**, as a white solid (21.5 mg, 0.131 mmol, 65%).

$^1\text{H NMR}$  (500 MHz,  $\text{CDCl}_3$ )  $\delta$  (ppm) = 7.41 (d,  $J$  = 8.8 Hz, 2H), 7.29 (t,  $J$  = 8.4 Hz, 2H), 7.03 (t,  $J$  = 7.4 Hz, 1H), 6.46 (s, 1H), 1.52 (s, 9H); The spectroscopic data obtained were in agreement with the reported data for the compound **3ac**.<sup>S18</sup>



## Variation of Benzimidazole

### Isopropyl 1H-benzo[d]imidazole-1-carboxylate (**4a**):

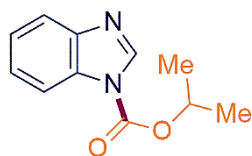

Following **GP1**, the starting materials Benzimidazole (0.2 mmol) and **2a** (0.4 mmol) afforded the compound **4a**, as a colourless liquid (26.94 mg, 0.132 mmol, 66%).

$^1\text{H NMR}$  (500 MHz,  $\text{CDCl}_3$ )  $\delta$  (ppm) = 8.48 (s, 1H), 8.03 (d,  $J = 7.8$  Hz, 1H), 7.80 (d,  $J = 9.13$  Hz, 1H), 7.35 – 7.42 (m, 2H), 5.30 – 5.37 (m, 1H), 1.50 (d,  $J = 6.3$  Hz, 6H);  $^{13}\text{C NMR}$  (126 MHz,  $\text{CDCl}_3$ )  $\delta$  (ppm) = 155.4, 149.2, 142.0, 125.5, 124.6, 120.8, 114.6, 73.0, 22.0; **HRMS (ESI)**:  $m/z$  calc. for  $(\text{C}_{14}\text{H}_{19}\text{N}_2\text{O}_2)^+$   $[\text{M}+\text{H}]^+$ : 205.0972; found: 205.0969; **IR (ATR)** ( $\nu \text{ cm}^{-1}$ ): 1758, 1521, 1460, 1387, 1251, 1110.

### Ethyl 1H-benzo[d]imidazole-1-carboxylate (**4b**):

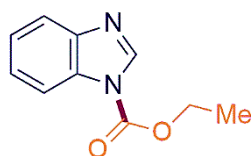

Following **GP 1**, the starting materials Benzimidazole (0.2 mmol) and **2b** (0.4 mmol) afforded the compound **4b**, as a white solid (27.77 mg, 0.146 mmol, 73%).

$^1\text{H NMR}$  (500 MHz,  $\text{CDCl}_3$ )  $\delta$  (ppm) = 8.47 (s, 1H), 8.02 (d,  $J = 7.7$  Hz, 1H), 7.79 (d,  $J = 7.6$  Hz, 1H), 7.35-7.42 (m, 2H), 4.54-4.58 (m, 2H), 1.51 (t,  $J = 6.3$  Hz, 3H); The spectroscopic data obtained were in agreement with the reported data for the compound **4b**.<sup>S15</sup>

### *tert*-butyl 1H-benzo[d]imidazole-1-carboxylate (**4c**):

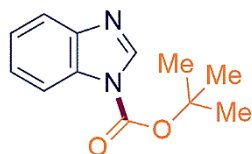

Following **GP1**, the starting materials Benzimidazole (0.2 mmol) and **2c** (0.4 mmol) afforded the compound **4c**, as a white solid (25.8 mg, 0.118 mmol, 59%).

$^1\text{H NMR}$  (500 MHz,  $\text{CDCl}_3$ )  $\delta$  (ppm) =  $\delta$  (ppm) = 8.43 (s, 1H), 7.98 (d,  $J = 7.8$  Hz, 1H), 7.78 (d  $J = 7.4$  Hz, 1H), 7.39-7.33 (m, 2H), 1.69 (s, 9H); The spectroscopic data obtained were in agreement with the reported data for the compound **4c**.<sup>S18</sup>

## Mechanistic Investigation

### Radical Trapping Experiment with TEMPO:

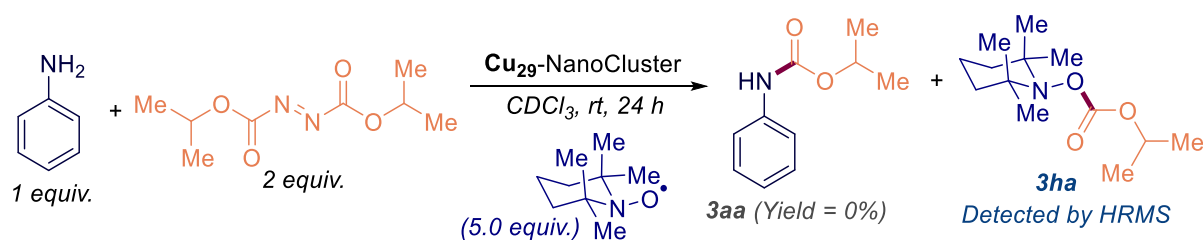

In an oven-dried screw cap vial equipped with a Teflon-coated stirring bar, Aniline **1** (0.2 mmol, 1.0 equiv.), Dialkylazodicarboxylate (**2**) (0.4 mmol, 2.0 equiv.),  $\text{Cu}_{29}$ -cluster (0.46  $\mu\text{mol}$ , 0.0023 equiv.) and TEMPO (1 mmol, 5 equiv.) were dissolved in dry  $\text{CDCl}_3$  (0.3 M) under inert atmosphere. The reaction mixture was stirred at room temperature for 3 h. The reaction was monitored by checking TLC and upon completion, the reaction was quenched by adding water and extracted with dichloromethane. The combined organic layers were washed once again with water (5 mL), followed by brine (5 mL) and the solvents were removed under reduced pressure. HRMS analysis of the crude reaction mixture identified Isopropyl (2,2,6,6-tetramethylpiperidin-1-yl) carbonate (Oxyacyl-TEMPO adduct) (**3ha**).

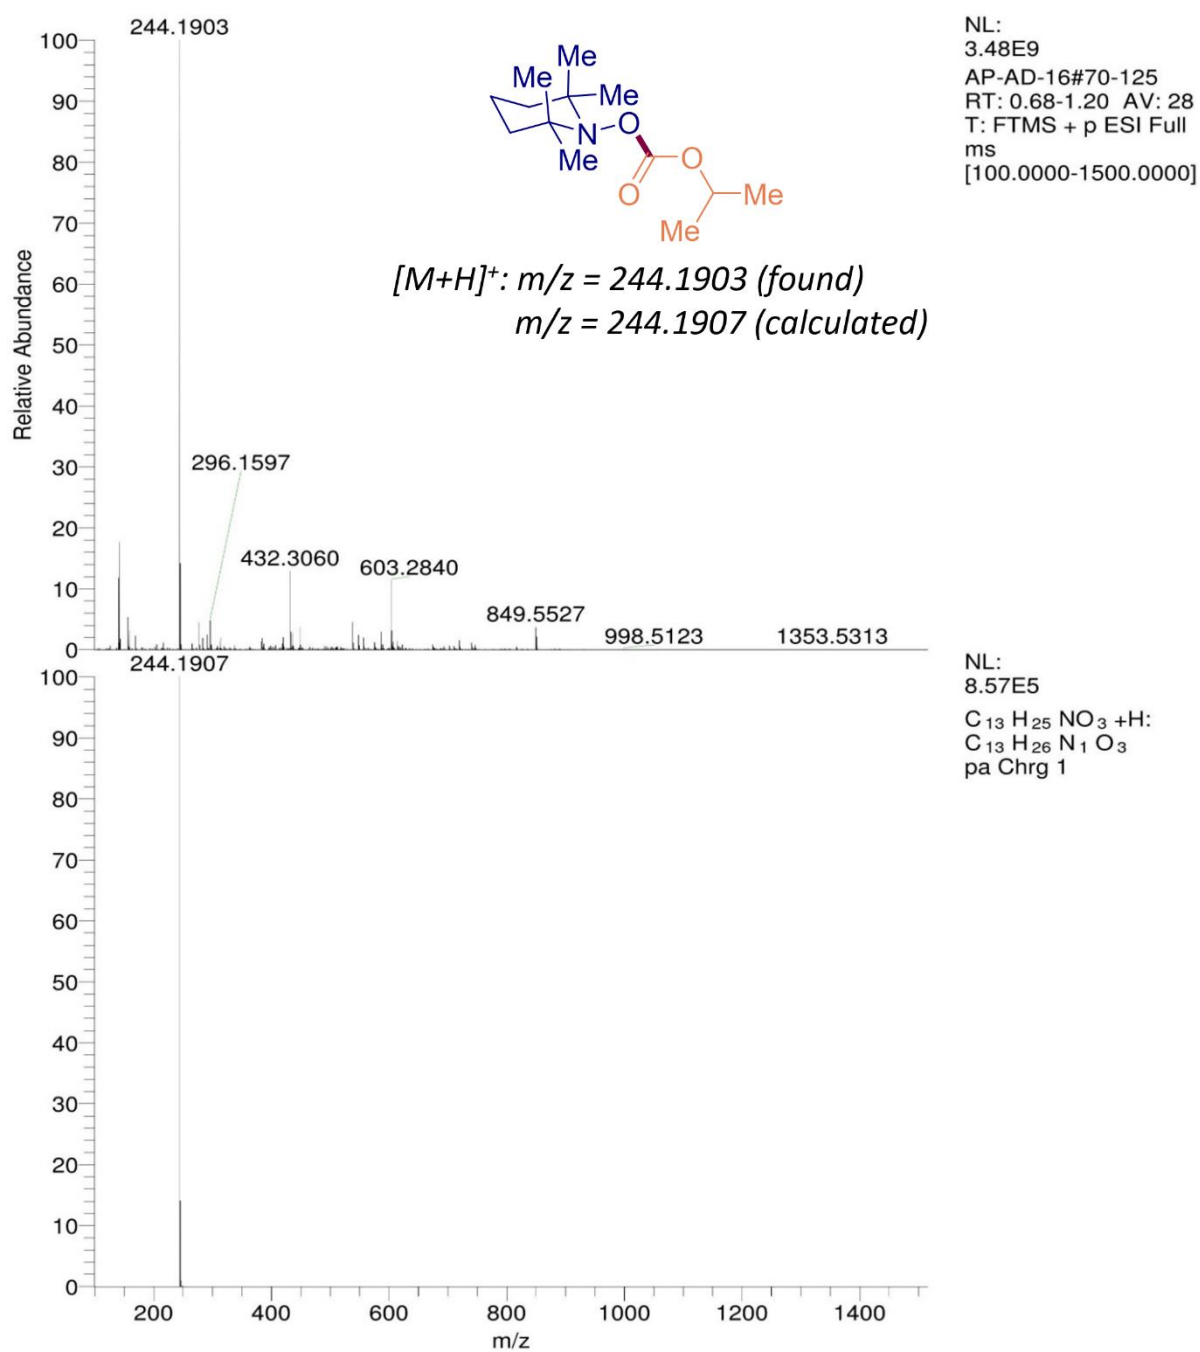

Detection of Isopropyl (2,2,6,6-tetramethylpiperidin-1-yl) carbonate (**3ha**) adduct in the crude reaction mixture of radical trapping experiment using TEMPO by HRMS analysis.

## Radical Experiment with 1,1-diphenylethene:

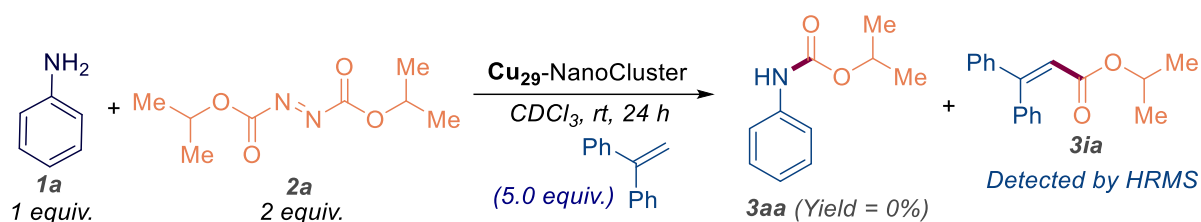

In an oven-dried screw cap vial equipped with a Teflon-coated stirring bar, Aniline **1** (0.2 mmol, 1.0 equiv.), Dialkylazodicarboxylate (**2**) (0.4 mmol, 2.0 equiv.), Cu<sub>29</sub>-Cluster (0.46 μmol, 0.0023 equiv.) and 1,1-diphenylethene (1 mmol, 5 equiv.) were dissolved in dry CDCl<sub>3</sub> (0.3 M) under inert atmosphere. The reaction mixture was stirred at room temperature for 3 h. The reaction was monitored by checking TLC and upon completion, the reaction was quenched by adding water and extracted with dichloromethane. The combined organic layers were washed once again with water (5 mL), followed by brine (5 mL) and the solvents were removed under reduced pressure. HRMS analysis of the crude reaction mixture identified Isopropyl 3,3-diphenylacrylate (**3ia**).

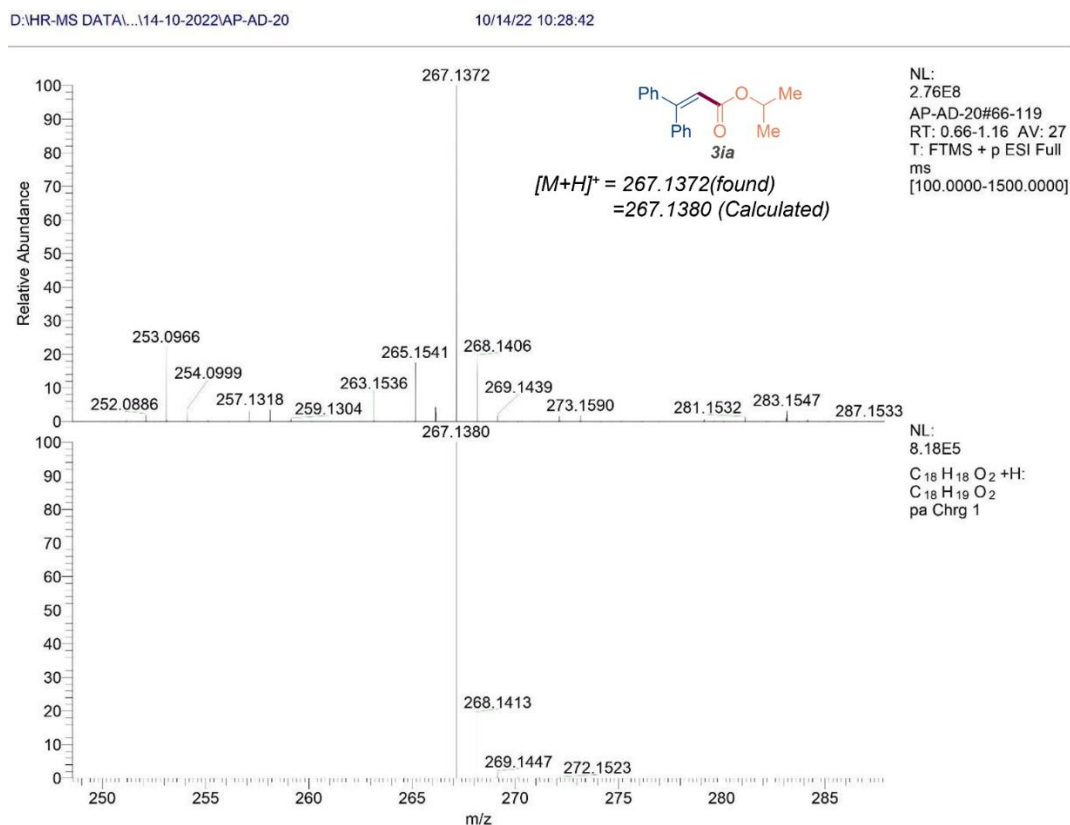

Detection of Isopropyl 3,3-diphenylacrylate (**3ia**) adduct in the crude reaction mixture of radical trapping experiment using 1,1-diphenylethene by HRMS analysis.

## Control Experiments

**Catalysis reaction without Cu<sub>29</sub>-Nanocluster:** In an oven-dried screw cap vial equipped with a Teflon-coated stirring bar, Aniline **1** (0.2 mmol, 1.0 equiv.), di-alkyl azodicarboxylate (**2**) (0.4 mmol, 2.0 equiv.) were dissolved in dry CDCl<sub>3</sub> (0.3 M) under inert atmosphere. The reaction mixture was stirred at room temperature for 3 h. The reaction was monitored by checking TLC and upon completion, the reaction was quenched by adding water and extracted with dichloromethane. The combined organic layers were washed once again with water (5 mL), followed by brine (5 mL) and the solvents were removed under reduced pressure. The crude reaction mixture was analysed by <sup>1</sup>H NMR using 1,3,5-trimethoxy benzene as an internal standard and no product formation had been identified.

**Catalysis reaction with CuI:** In an oven-dried screw cap vial equipped with a Teflon-coated stirring bar, Aniline **1** (0.2 mmol, 1.0 equiv.), di-alkyl azodicarboxylate (**2**) (0.4 mmol, 2.0 equiv.) CuI (21 μmol) were dissolved in dry CDCl<sub>3</sub> (0.3 M) under inert atmosphere. The reaction mixture was stirred at room temperature for 3 h. The reaction was monitored by checking TLC and upon completion, the reaction was quenched by adding water and extracted with dichloromethane. The combined organic layers were washed once again with water (5 mL), followed by brine (5 mL) and the solvents were removed under reduced pressure. The crude reaction mixture was analysed by <sup>1</sup>H NMR using 1,3,5-trimethoxy benzene as an internal standard and yield is 5%.

**Catalyst regeneration:** In an oven-dried screw cap vial equipped with a Teflon-coated stirring bar, 4-bromo aniline (**1f**) (0.2 mmol, 1.0 equiv.), diisopropyl azodicarboxylate (**2a**) (0.4 mmol, 2.0 equiv.), Cu<sub>29</sub>-nanocluster (0.46 μmol, 0.0023 equiv.) were dissolved in dry CDCl<sub>3</sub> (0.3 M) under an inert atmosphere. The reaction mixture was stirred at room temperature for 3 h. The reaction was monitored by checking TLC, and upon completion, the reaction was quenched by adding water and extracted with dichloromethane. The combined organic layers were washed once again with water (5 mL), followed by brine (5 mL), and the solvents were removed under reduced pressure. The crude reaction mixture was washed with 20% ethyl acetate/ petroleum ether to remove all the organic compounds from the catalytic reaction mixture followed by the remaining crude was washed with distilled CHCl<sub>3</sub> to get back the Cu<sub>29</sub> NC (catalyst) and organic crude was purified by using flash column chromatography through Silica gel (eluent: ethyl acetate/ petroleum ether) to afford pure product **3fa**.

**N.B. Recovered Cu<sub>29</sub> NC after the catalytic reaction was also well characterised by using <sup>1</sup>H NMR, mass Spectrometry and absorption studies.**

**Table S1.** Crystal data and structure refinement parameters.

|                                                       |                                                                                                                                  |
|-------------------------------------------------------|----------------------------------------------------------------------------------------------------------------------------------|
| Identification code                                   | Cu <sub>29</sub> NC                                                                                                              |
| Empirical formula                                     | C <sub>243</sub> H <sub>359</sub> B <sub>2</sub> Cl <sub>21</sub> Cu <sub>58</sub> F <sub>8</sub> P <sub>8</sub> S <sub>24</sub> |
| CCDC number                                           | 2242226                                                                                                                          |
| Formula weight                                        | 8900.87                                                                                                                          |
| Temperature/K                                         | 100(2)                                                                                                                           |
| Wavelength/Å                                          | 0.71073                                                                                                                          |
| Crystal system                                        | Triclinic                                                                                                                        |
| Space group                                           | <i>P</i> -1 (No. 2)                                                                                                              |
| <i>a</i> /Å                                           | 24.596(5)                                                                                                                        |
| <i>b</i> /Å                                           | 28.305(6)                                                                                                                        |
| <i>c</i> /Å                                           | 29.247(6)                                                                                                                        |
| $\alpha$ /°                                           | 64.888(8)                                                                                                                        |
| $\beta$ /°                                            | 81.085(9)                                                                                                                        |
| $\gamma$ /°                                           | 81.878(9)                                                                                                                        |
| Volume/Å <sup>3</sup>                                 | 18149(6)                                                                                                                         |
| <i>Z</i>                                              | 2                                                                                                                                |
| $\rho_{\text{calc}}/\text{cm}^3$                      | 1.629                                                                                                                            |
| $\mu/\text{mm}^{-1}$                                  | 3.679                                                                                                                            |
| F(000)                                                | 8884                                                                                                                             |
| Crystal size/mm <sup>3</sup>                          | 0.095 × 0.048 × 0.028                                                                                                            |
| 2 $\theta$ range for data collection/°                | 0.852 to 24.000                                                                                                                  |
| Index ranges                                          | -28 ≤ <i>h</i> ≤ 28, -32 ≤ <i>k</i> ≤ 32, -33 ≤ <i>l</i> ≤ 33                                                                    |
| Reflections collected                                 | 193059                                                                                                                           |
| Independent reflections                               | 12945 [R(int) = 0.4288]                                                                                                          |
| Data/restraints/parameters                            | 56494 / 5490 / 3086                                                                                                              |
| Goodness-of-fit on F <sup>2</sup>                     | 0.912                                                                                                                            |
| Final R indexes [ <i>I</i> ≥ 2 $\sigma$ ( <i>I</i> )] | R <sub>1</sub> = 0.1233, wR <sub>2</sub> = 0.2983                                                                                |
| Largest diff. peak/hole / e Å <sup>-3</sup>           | 1.779 and -1.881                                                                                                                 |

**Table S2.** Position of ten hydrides in the Cu<sub>29</sub> NC.

| Chemical shift (ppm) | Peaks integration | Hydrides identification in the structure |
|----------------------|-------------------|------------------------------------------|
| 2.01                 | 5                 | (i) 5 $\mu_3$ bridged hydrides           |
| 2.17                 | 1                 | (ii) 1 $\mu_3$ bridged hydride           |
| 2.94                 | 1                 | (iii) 1 $\mu_3$ bridged hydride          |
| 3.01                 | 1                 | (iv) 1 $\mu_3$ bridged hydride           |
| 3.49 & 3.50          | 2                 | (v) 2 $\mu_5$ bridged hydrides           |

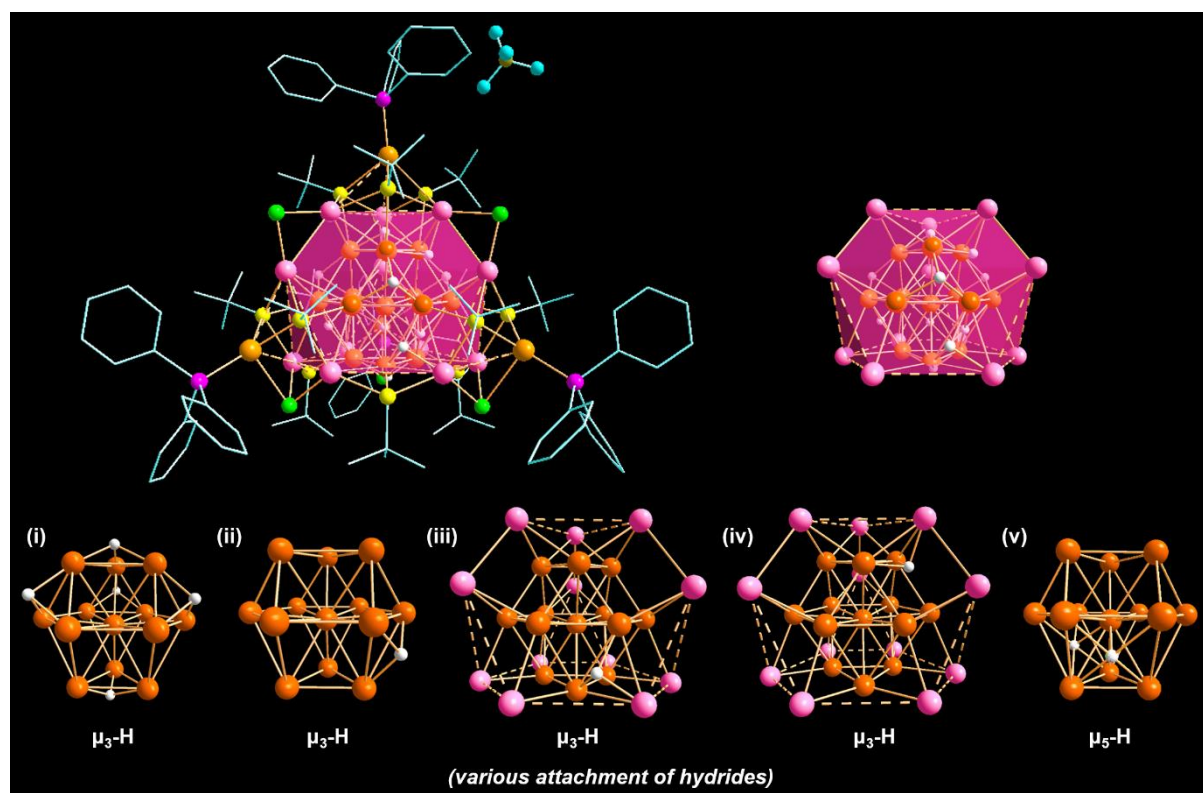

The total crystal structure of Cu<sub>29</sub> NC with various hydride attachments. Color legend; Cu(core), deep orange; Cu(Cu<sub>12</sub> shell), rose; Cu(Cu<sub>4</sub> shell), light orange; S, yellow; P, magenta; Cl, green; C, grey stick; B, dark yellow; F, turquoise; H, white. H atoms and solvent molecules are partially omitted for clarity.

**Table S3.** Theoretical insights into the mechanism of the catalysis reaction.

| <b>Step</b> | <b>Free energy change (eV)</b> | <b>Proposed reasons</b>                                                                                                      |
|-------------|--------------------------------|------------------------------------------------------------------------------------------------------------------------------|
| a → b       | -0.74 (exergonic)              | H-bonding interaction (2.8-3.1 Å) between the Azo and Cl atoms of Cu <sub>29</sub> NC                                        |
| b → c       | +2.58 (endergonic)             | Electronic repulsion between the free radicals on the carbon atoms and the lone pairs on the Cl atoms in Cu <sub>29</sub> NC |
| c → d       | -0.61 (exergonic)              | N-H bond of aniline approaching the carbonyl radical                                                                         |
| d → TS → e  | -0.48 (exergonic)              | Formation of stable C-H $\sigma$ -bond of carbonyl <i>via</i> H• transfer from aniline to carbonyl                           |
| e → f       | -3.7 (exergonic)               | Formation of the final stable carbamate compound                                                                             |



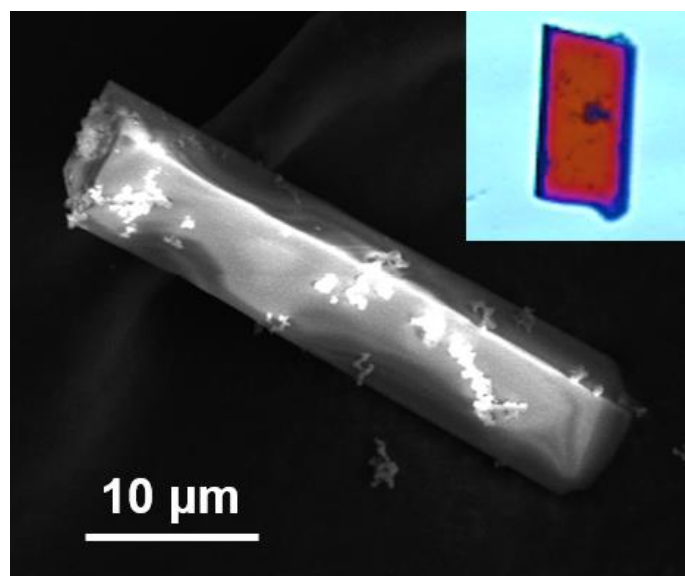

**Fig. S1** SEM and optical microscope (inset) images of Cu<sub>29</sub> crystal.

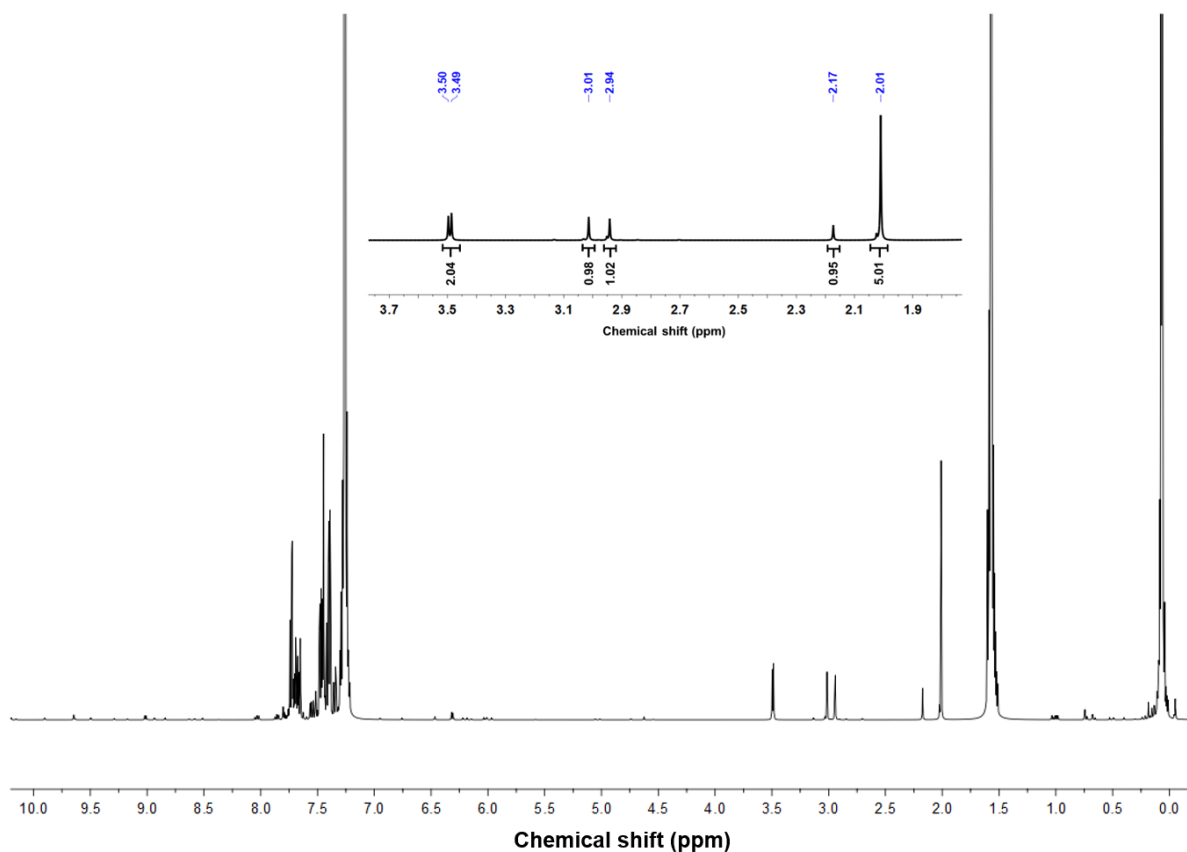

**Fig. S2**  $^1\text{H}$  NMR of  $\text{Cu}_{29}\text{ NC}$ . A sharp peak at 1.569 ppm is associated with the proton of the *tert*-butyl group. A few more broad peaks are obtained in the aromatic proton region which originates from protons of the  $\text{PPh}_3$  ligand. This broadening is attributed to more significant differences in the environments of the auxiliary ligands.<sup>S5</sup> Inset highlights the hydride region of the  $\text{Cu}_{29}\text{ NC}$ .

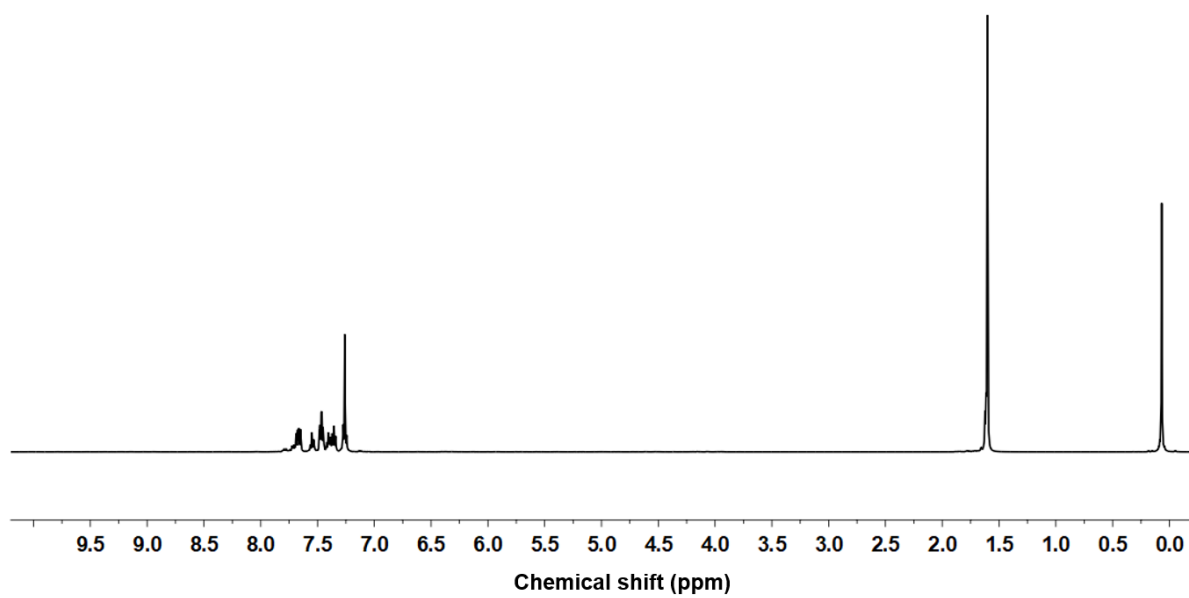

**Fig. S3** The  $^1\text{H}$  NMR of the  $\text{Cu}_{29}\text{D}$  NC.

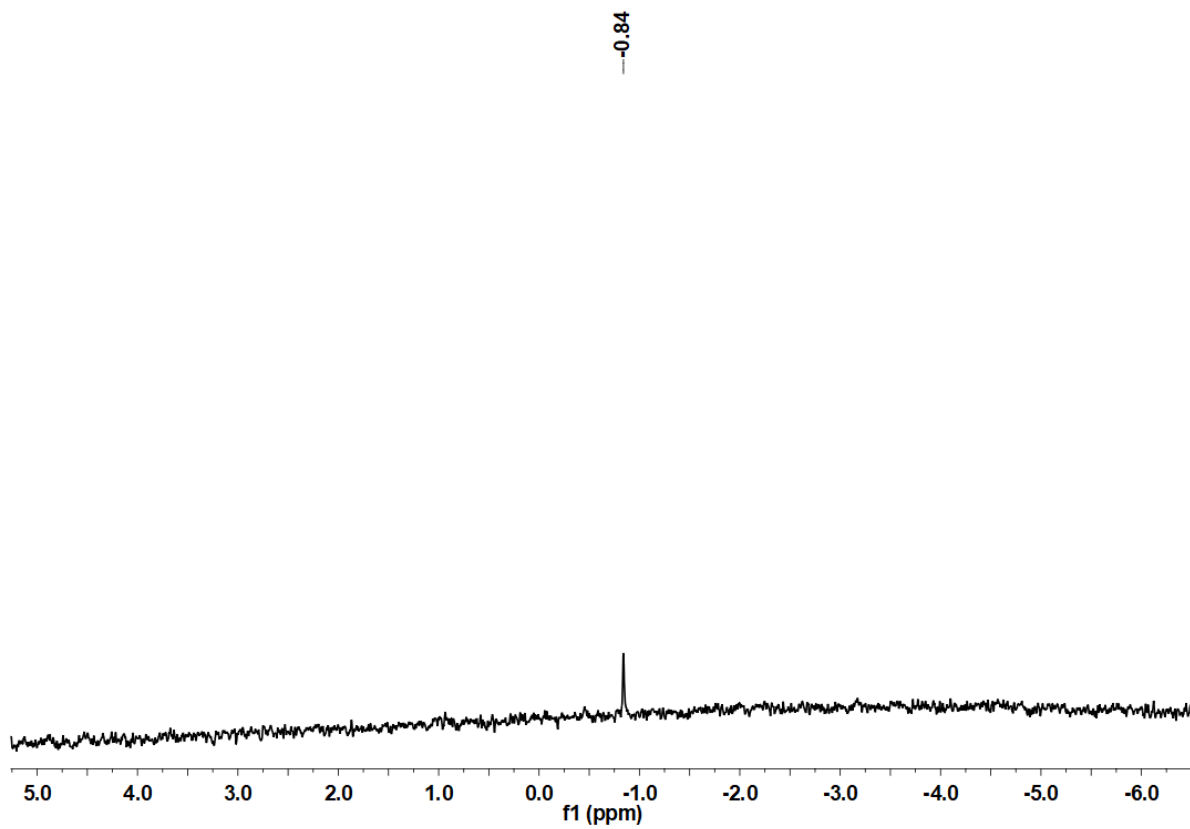

**Fig. S4**  $^{11}\text{B}$  NMR of  $\text{Cu}_{29}\text{NC}$ .

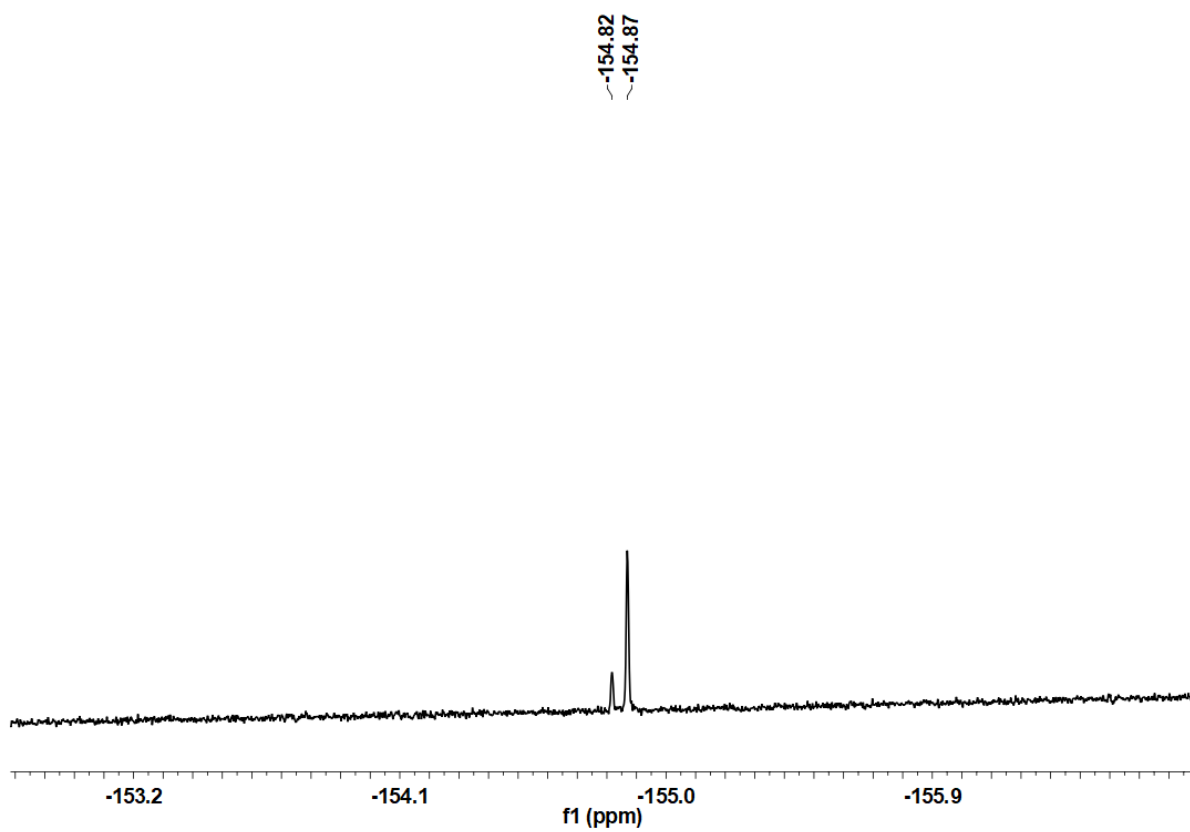

**Fig. S5**  $^{19}\text{F}$  NMR of  $\text{Cu}_{29}\text{NC}$ .

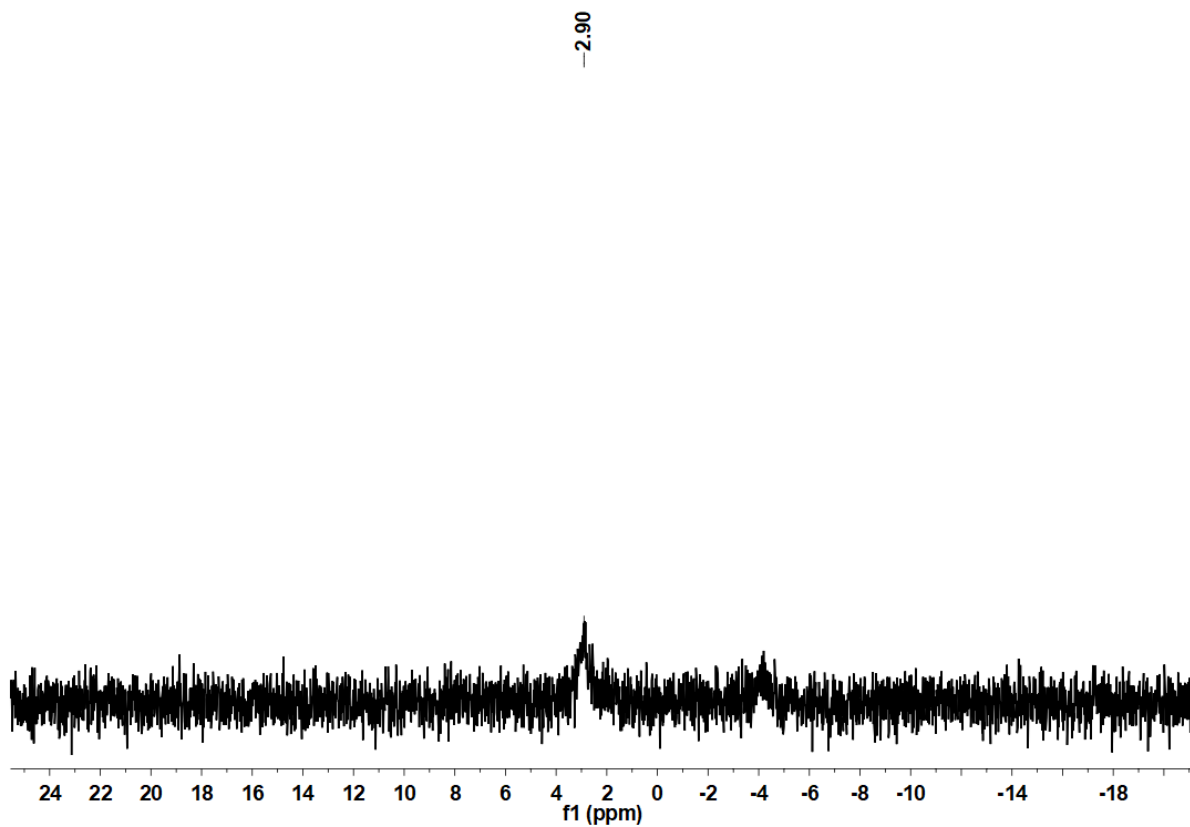

**Fig. S6**  $^{31}\text{P}$  NMR of  $\text{Cu}_{29}\text{NC}$ .

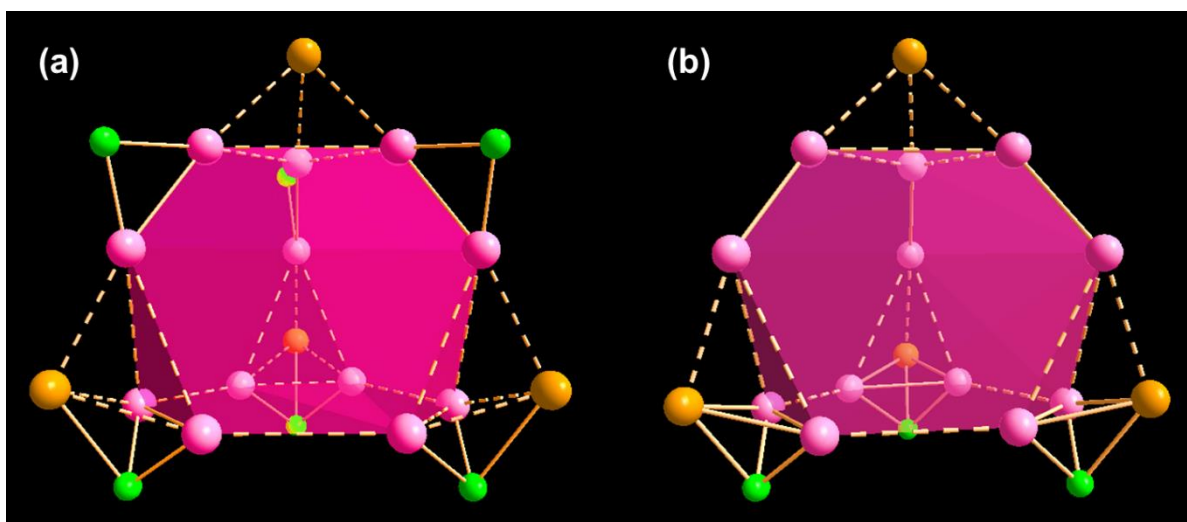

**Fig. S7** (a)  $\mu_2$  and  $\mu_3$  bridging modes of  $\text{Cl}^-$  in the shell of the  $\text{Cu}_{29}$  NC, and (b)  $\mu_3$  bridging modes of  $\text{Cl}^-$  in the shell of the reported  $[\text{Cu}_{29}(\text{SAdm})_{15}\text{Cl}_3(\text{P}(\text{Ph}-\text{Cl})_3)_4\text{H}_{10}]^+$  NC. Color legend; Cu( $\text{Cu}_{12}$  shell), rose; Cu( $\text{Cu}_4$  shell), light orange; Cl, green.

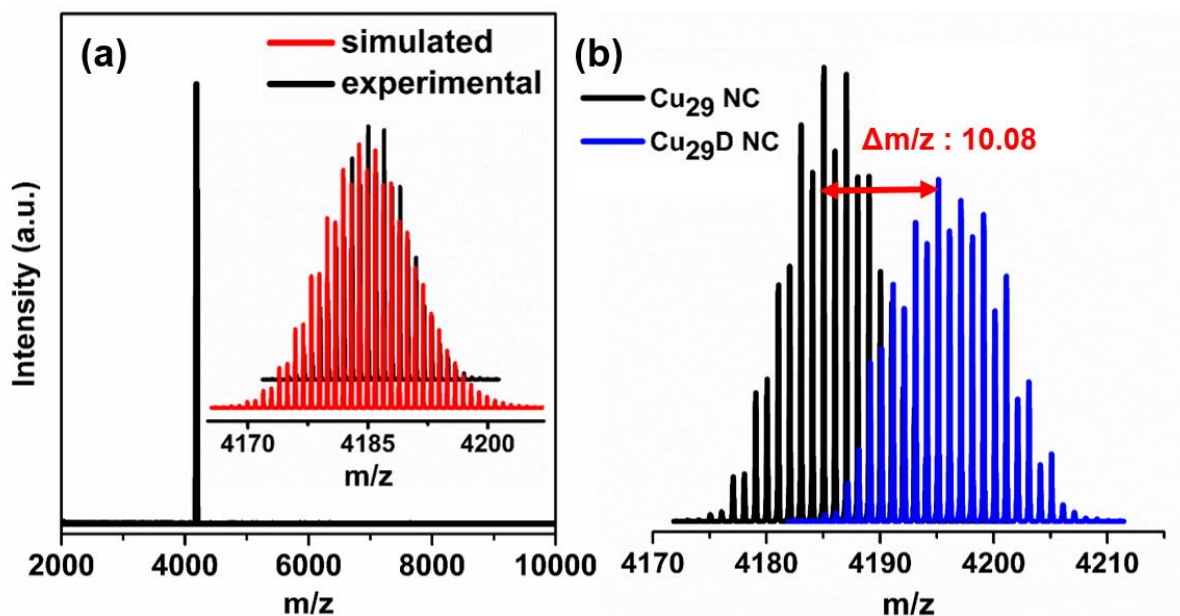

**Fig. S8** (a) Positive mode ESI-MS spectrum of  $\text{Cu}_{29}$  NC. Inset showing the good agreement between the simulated and experimental isotopic patterns of the peak corresponding to  $[\text{Cu}_{29}(\text{S}'\text{Bu})_{12}(\text{PPh}_3)_4\text{Cl}_6\text{H}_{10}]^+$ , and (b) the mass difference of the isotopic patterns between the  $\text{Cu}_{29}$  NC and  $\text{Cu}_{29}\text{D}$  NC.



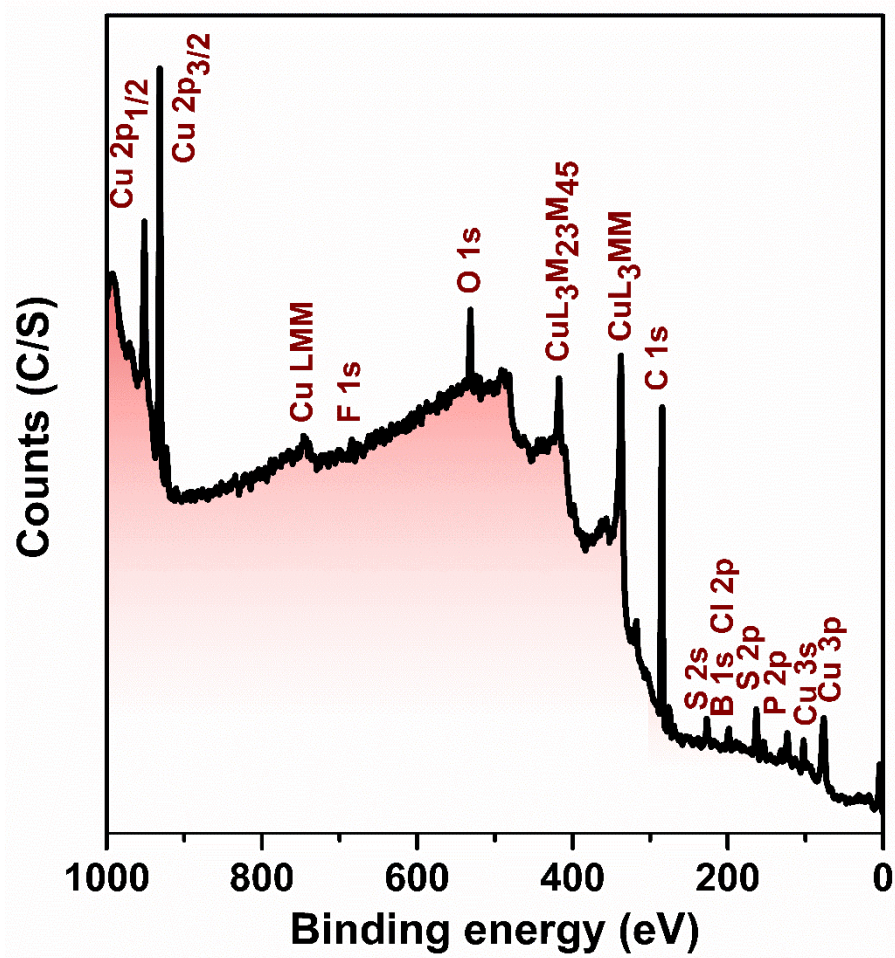

**Fig. S9** XPS survey spectrum of Cu<sub>29</sub> NC. The acquired XPS survey spectrum demonstrates the presence of all the necessary elements.

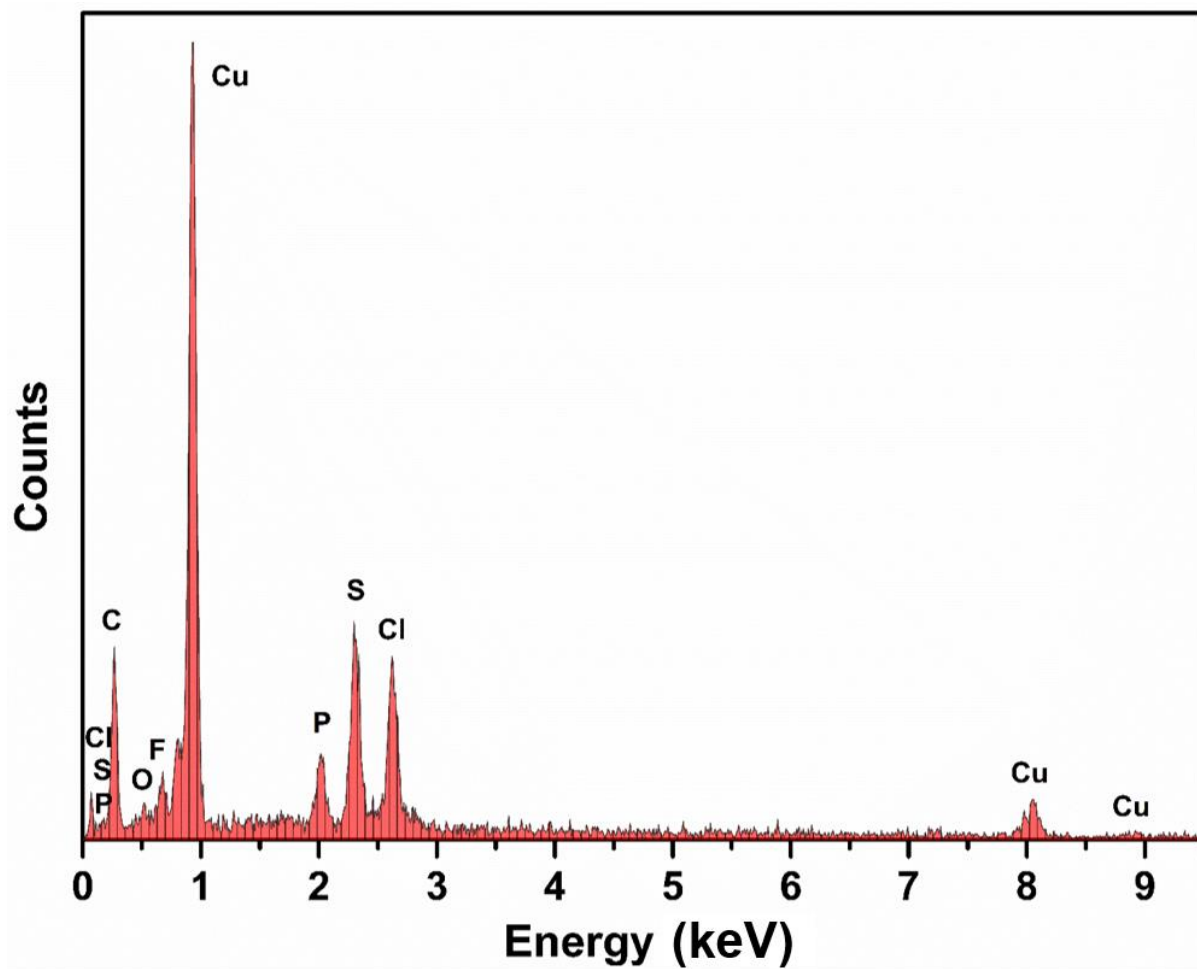

**Fig. S10** Energy dispersive spectrum of  $\text{Cu}_{29}\text{NC}$ . The obtained result is also corroborated with the crystal structure by the elemental analysis.

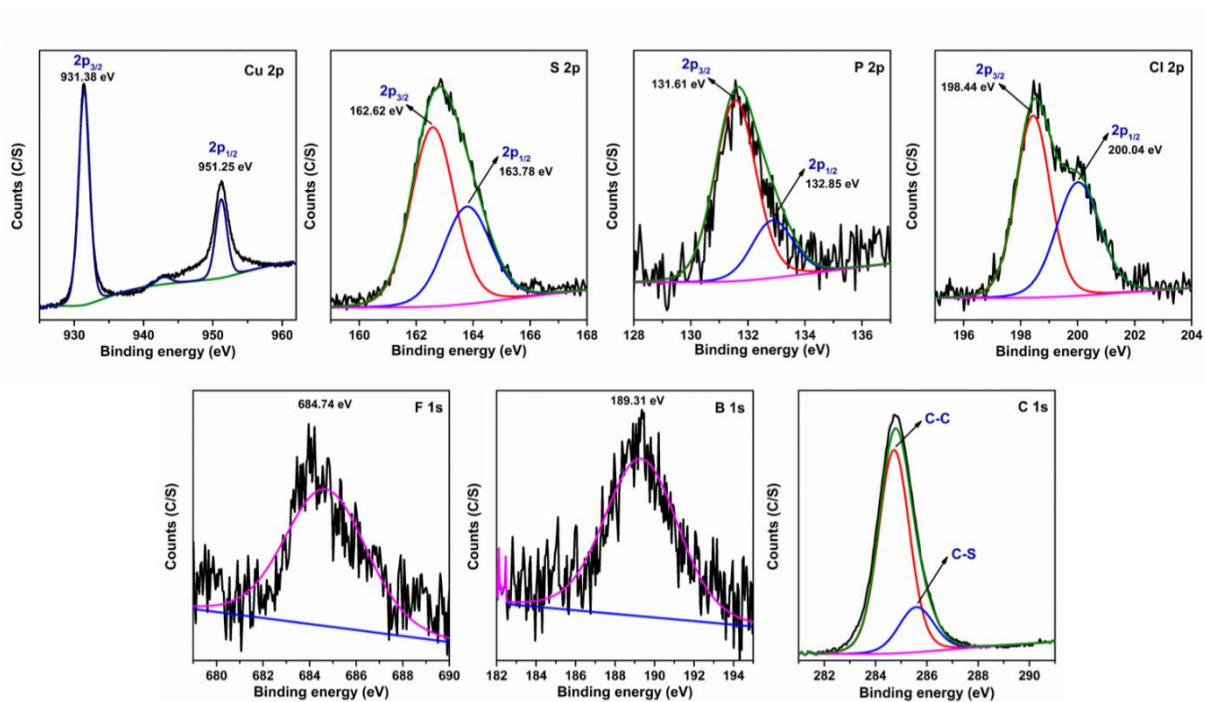

**Fig. S11** High-resolution XPS spectra of each element.

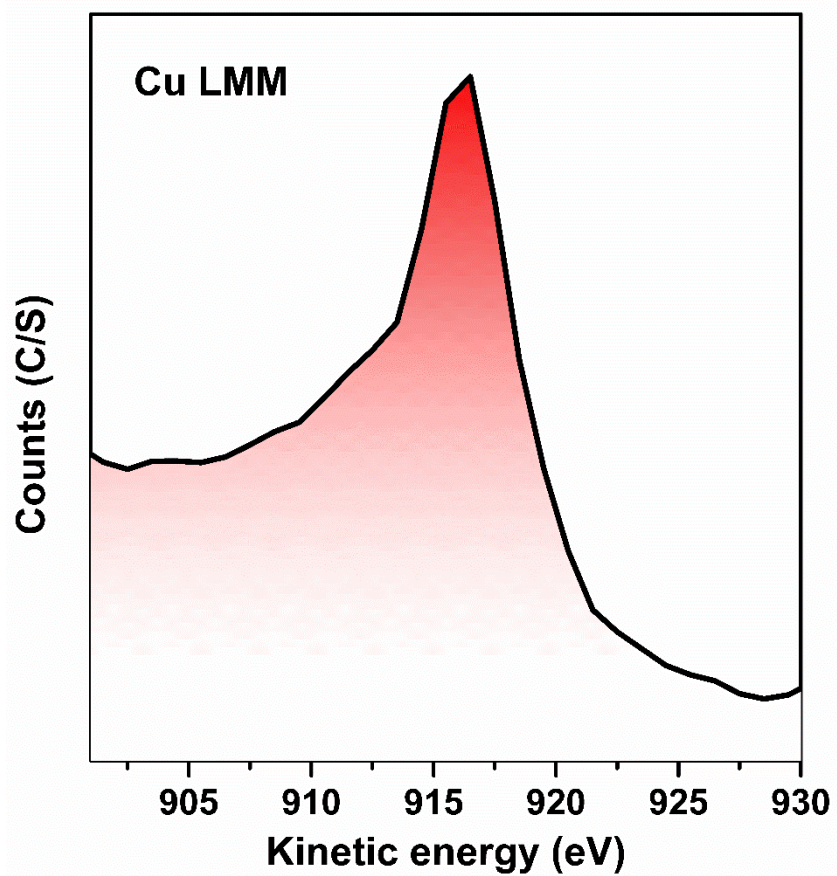

**Fig. S12** Cu LMM Auger spectrum of  $\text{Cu}_{29}$  NC.

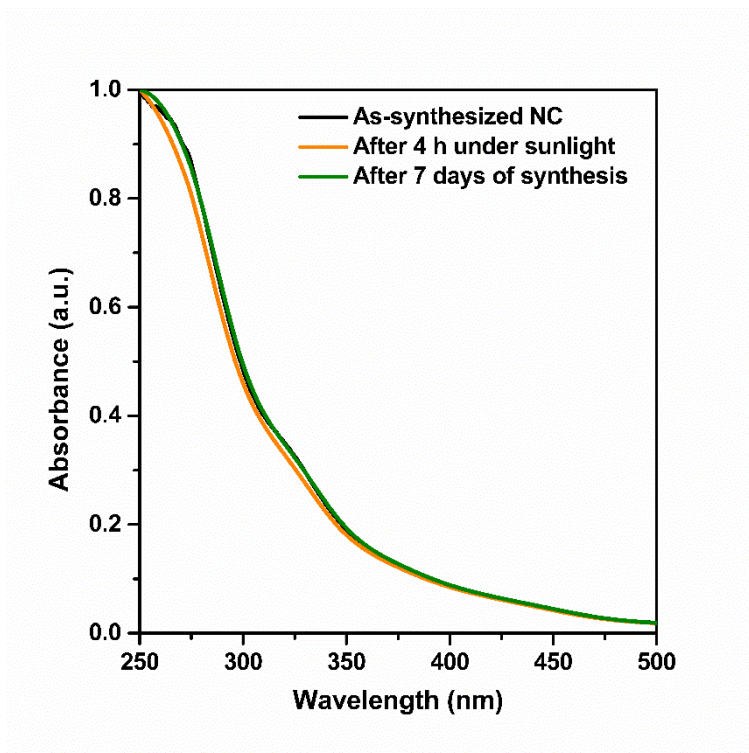

**Fig. S13** Stability of as-synthesized Cu<sub>29</sub> NC after exposing the crystals to sunlight for 4 hours and after 7 days keeping the crystals at ambient conditions. Note: In both the cases, before performing the absorption studies, we have dissolved the crystals in chloroform.

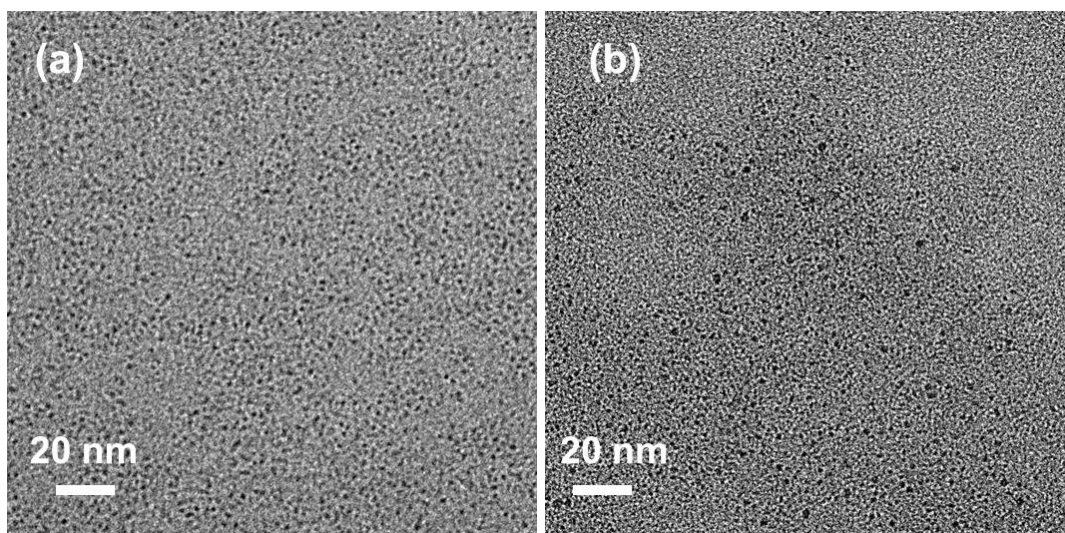

**Fig. S14** TEM images of  $\text{Cu}_{29}$  NC (a) before and (b) after the catalytic reaction.

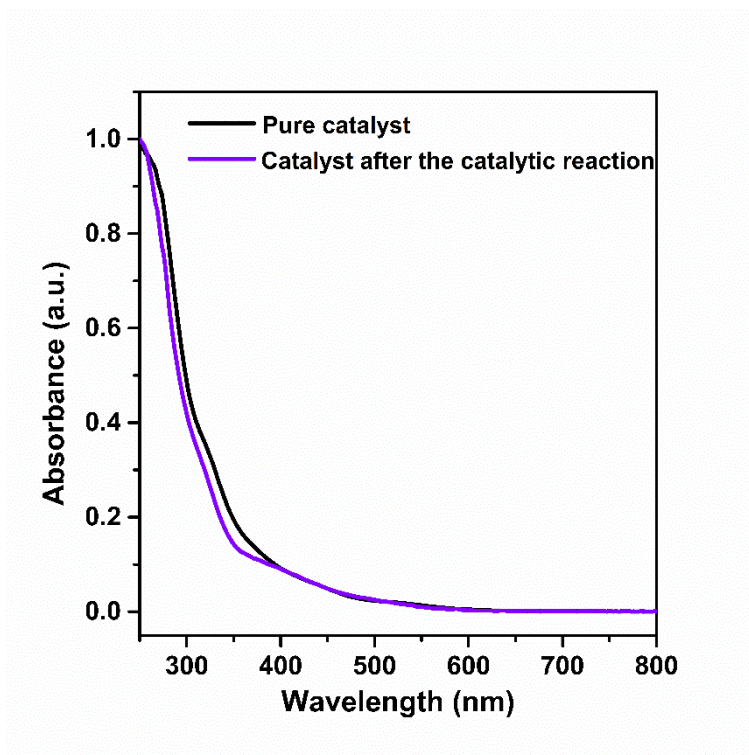

**Fig. S15** Comparison of UV-vis data between the pure catalyst and isolated catalyst (after separating the catalyst from the catalytic reaction mixture) dissolved in chloroform. This suggests that the catalyst remains stable throughout the catalytic process.

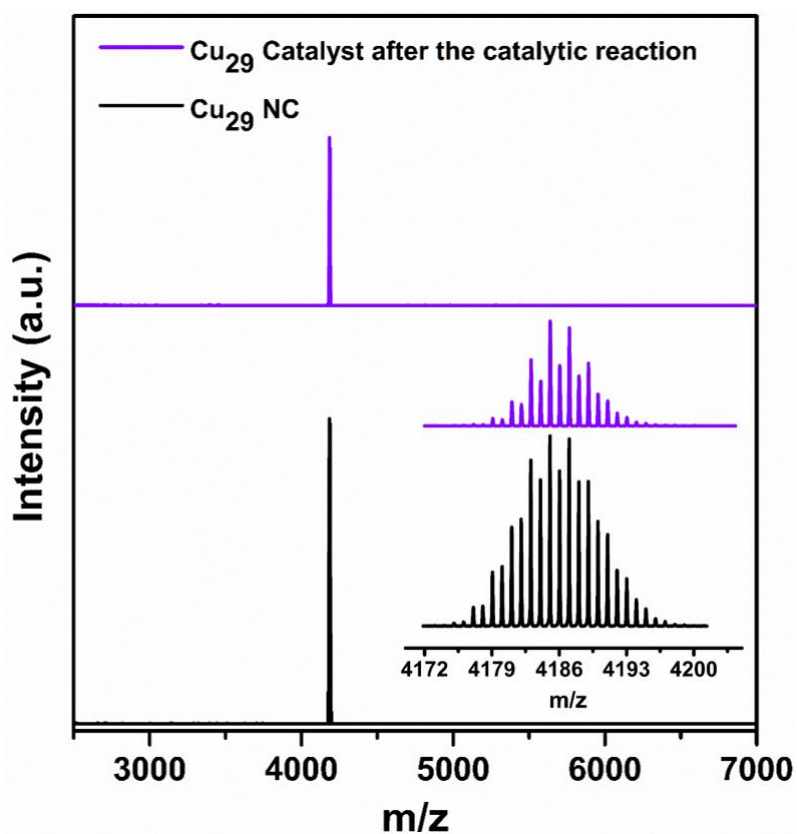

**Fig. S16** Positive mode ESI-MS data of the pure catalyst and the isolated catalyst from the catalytic reaction mixture, inset shows that good overlap of the isotopic patterns between the pure catalyst and isolated catalyst.



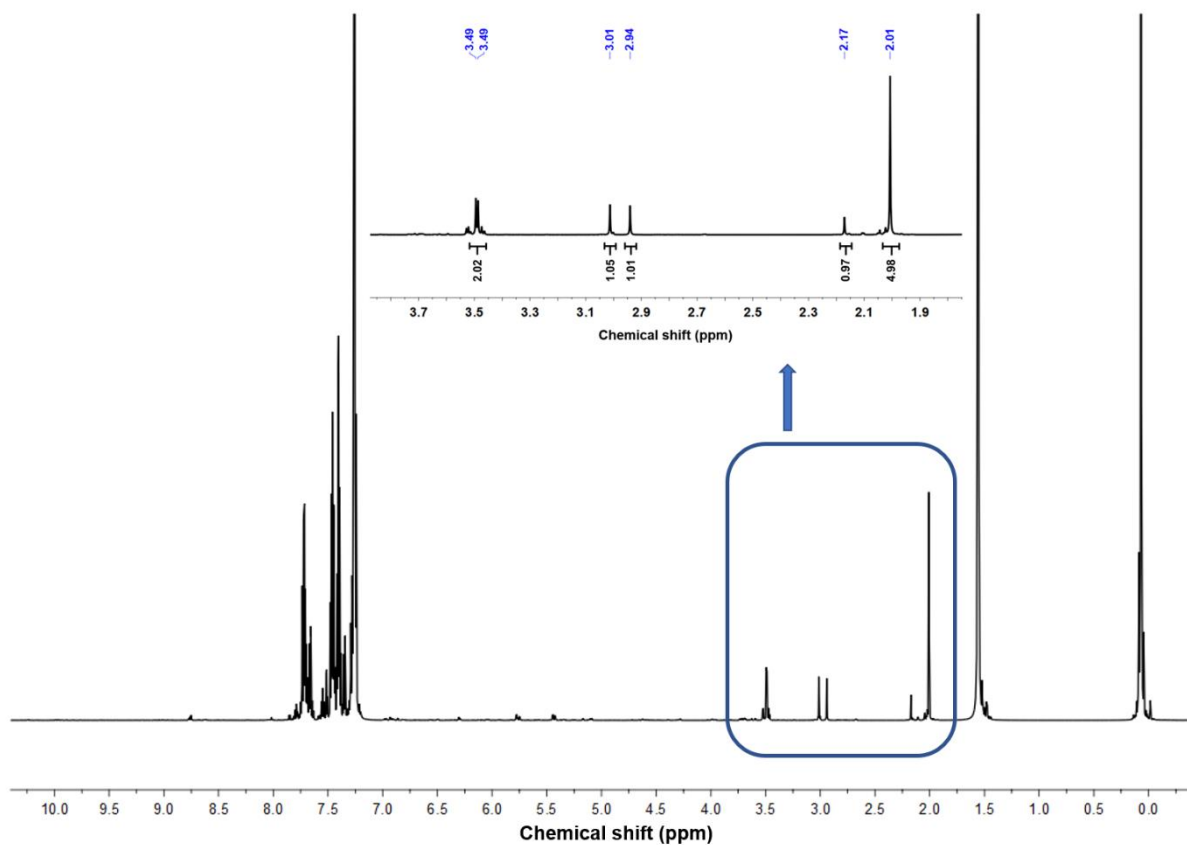

**Fig. S17**  $^1\text{H}$  NMR of the isolated catalyst after the catalytic reaction, inset: showing the zoomed version of the specific area which further confirmed the similar quantification of the hydrides.

# NMR spectra

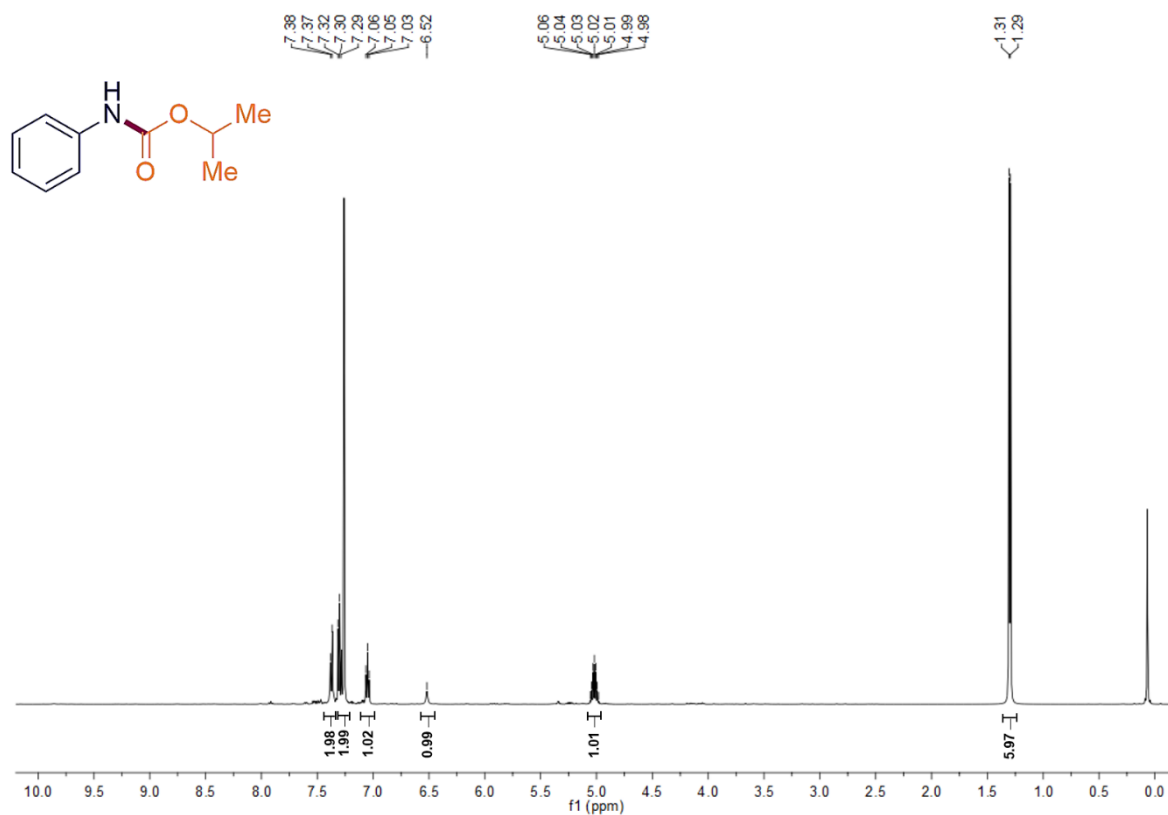

<sup>1</sup>H NMR spectrum of **3aa** (500 MHz, CDCl<sub>3</sub>).

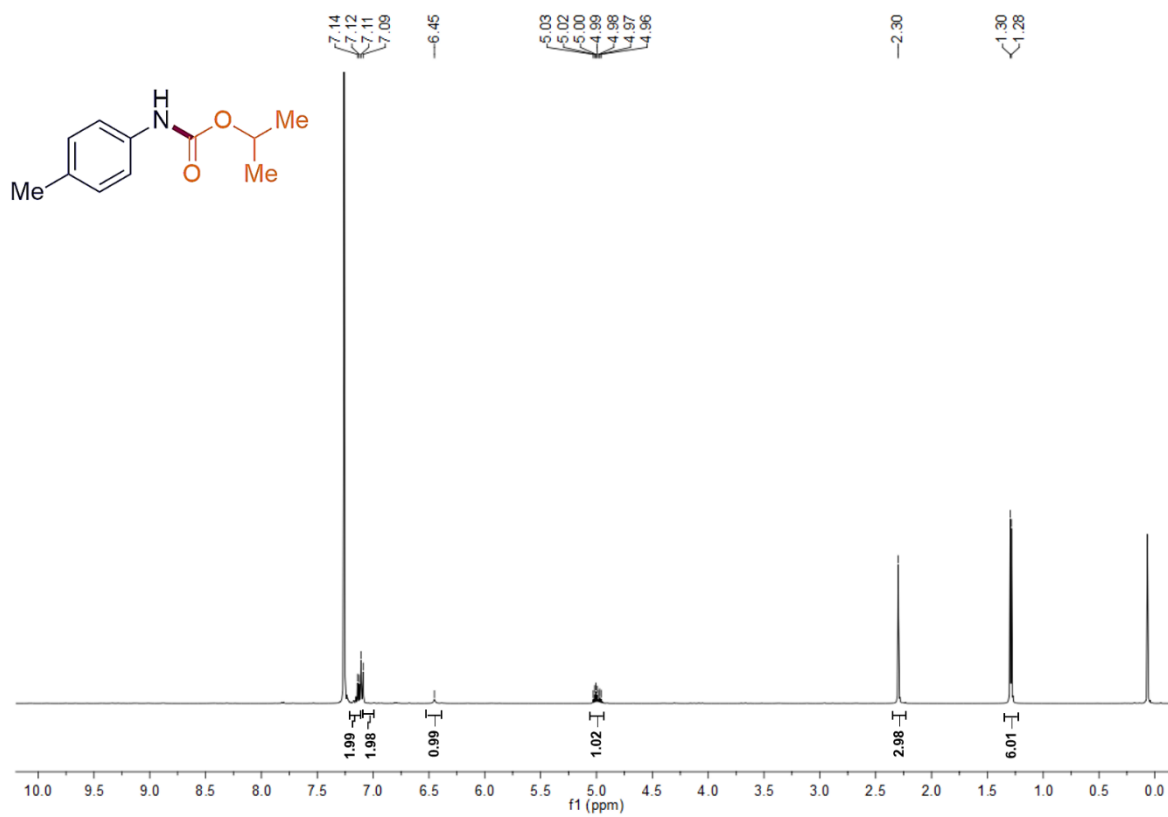

$^1\text{H}$  NMR spectrum of **3ba** (500 MHz,  $\text{CDCl}_3$ ).

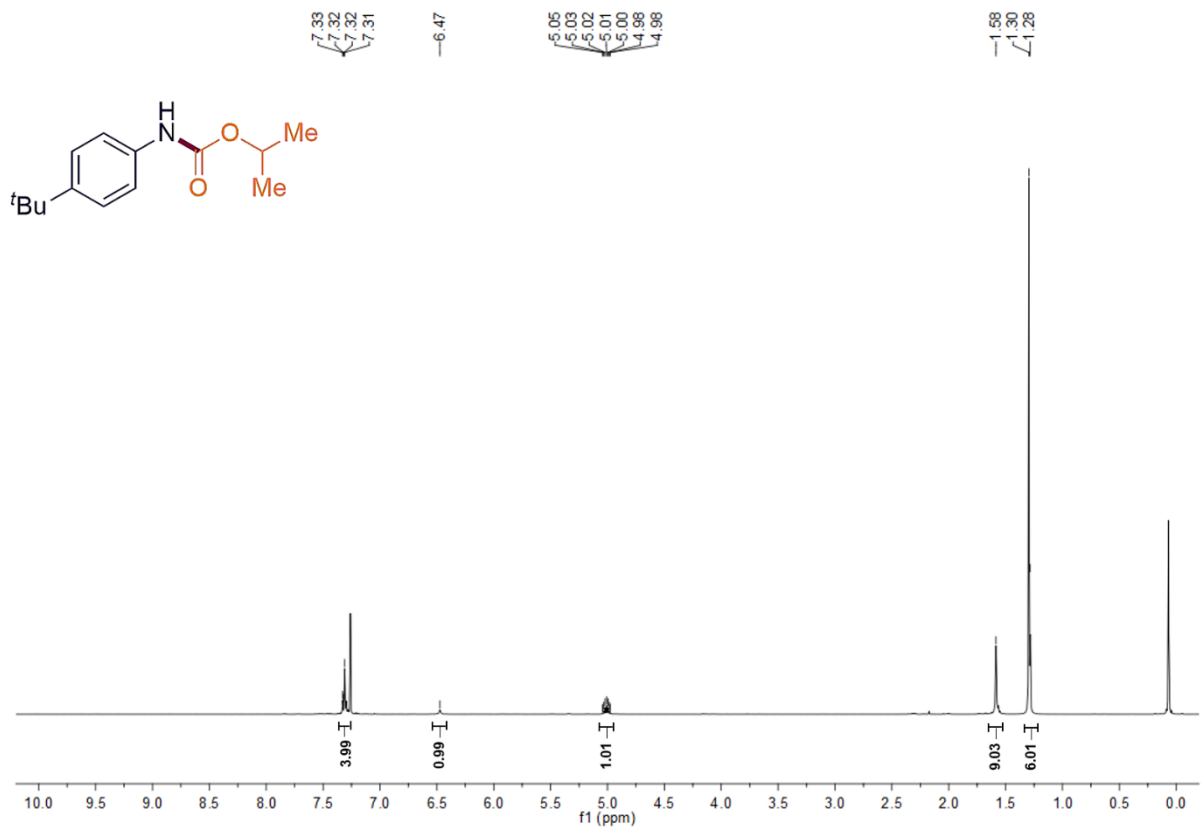

$^1\text{H}$  NMR spectrum of **3a** (500 MHz,  $\text{CDCl}_3$ ).

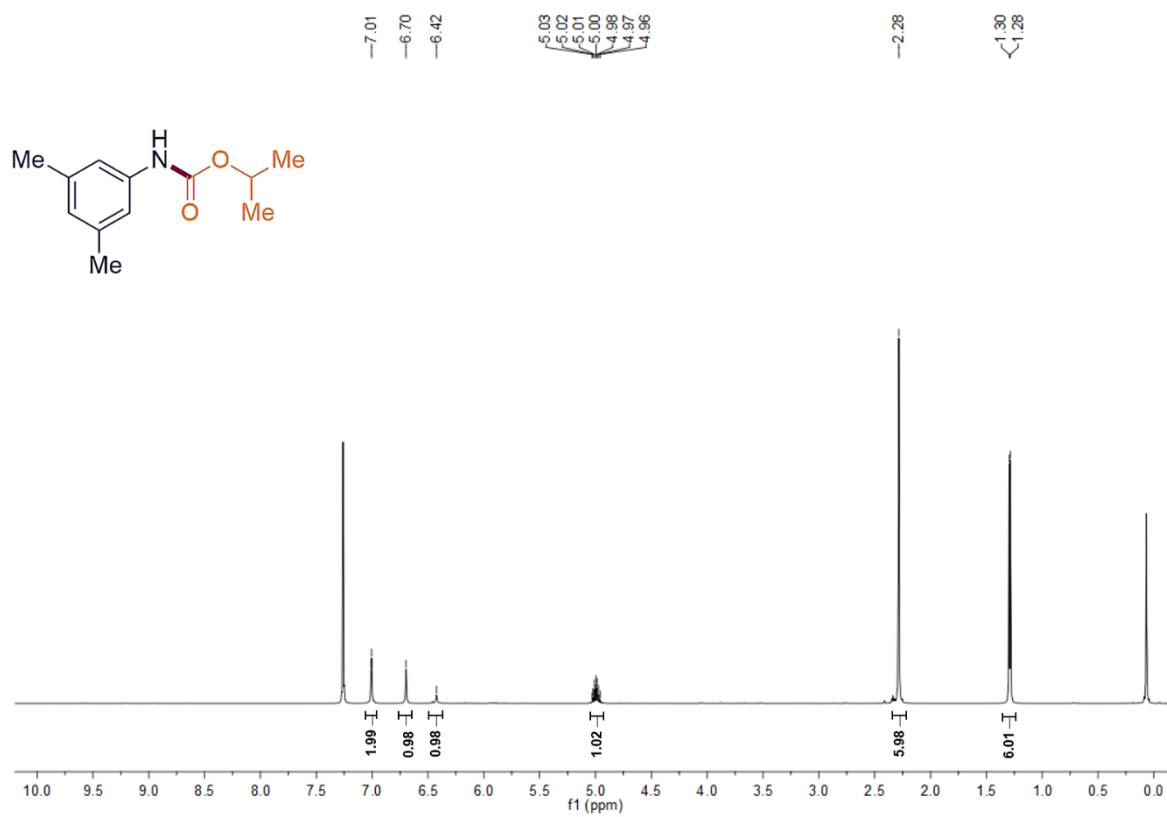

<sup>1</sup>H NMR spectrum of **3da** (500 MHz, CDCl<sub>3</sub>)

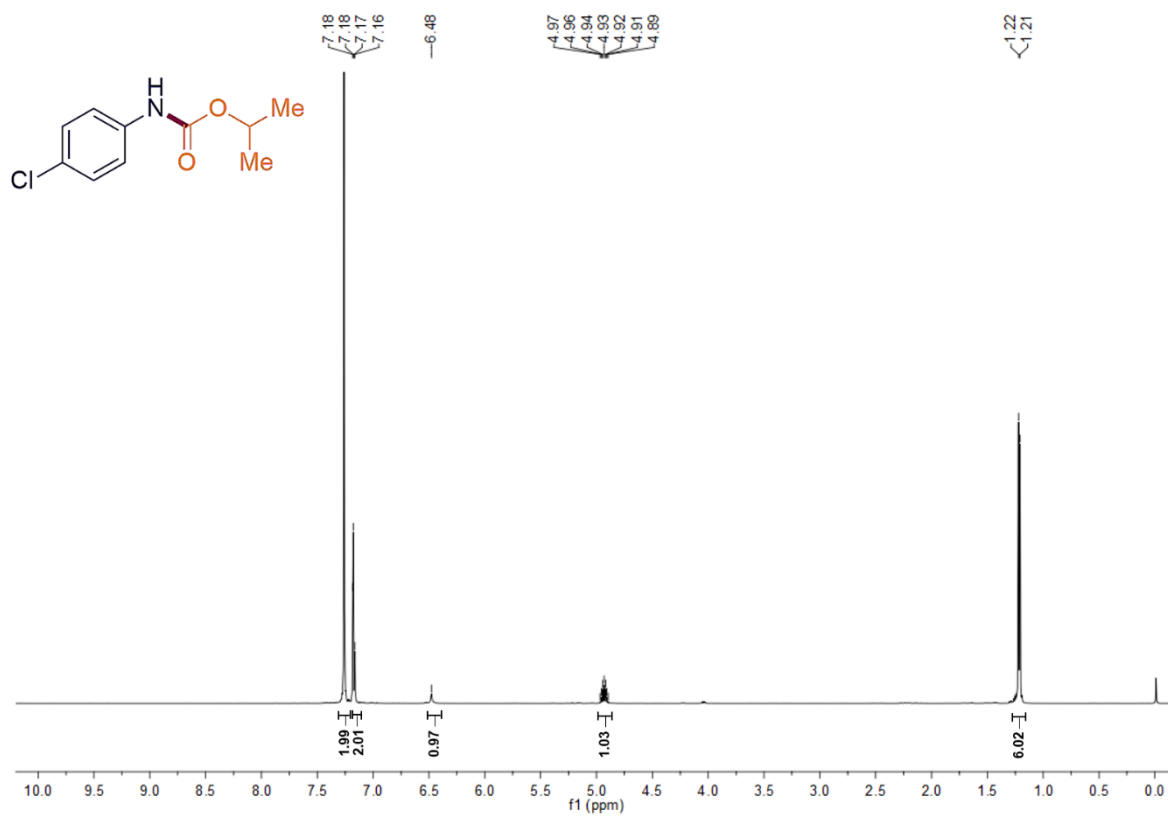

<sup>1</sup>H NMR spectrum of **3ea** (500 MHz, CDCl<sub>3</sub>)

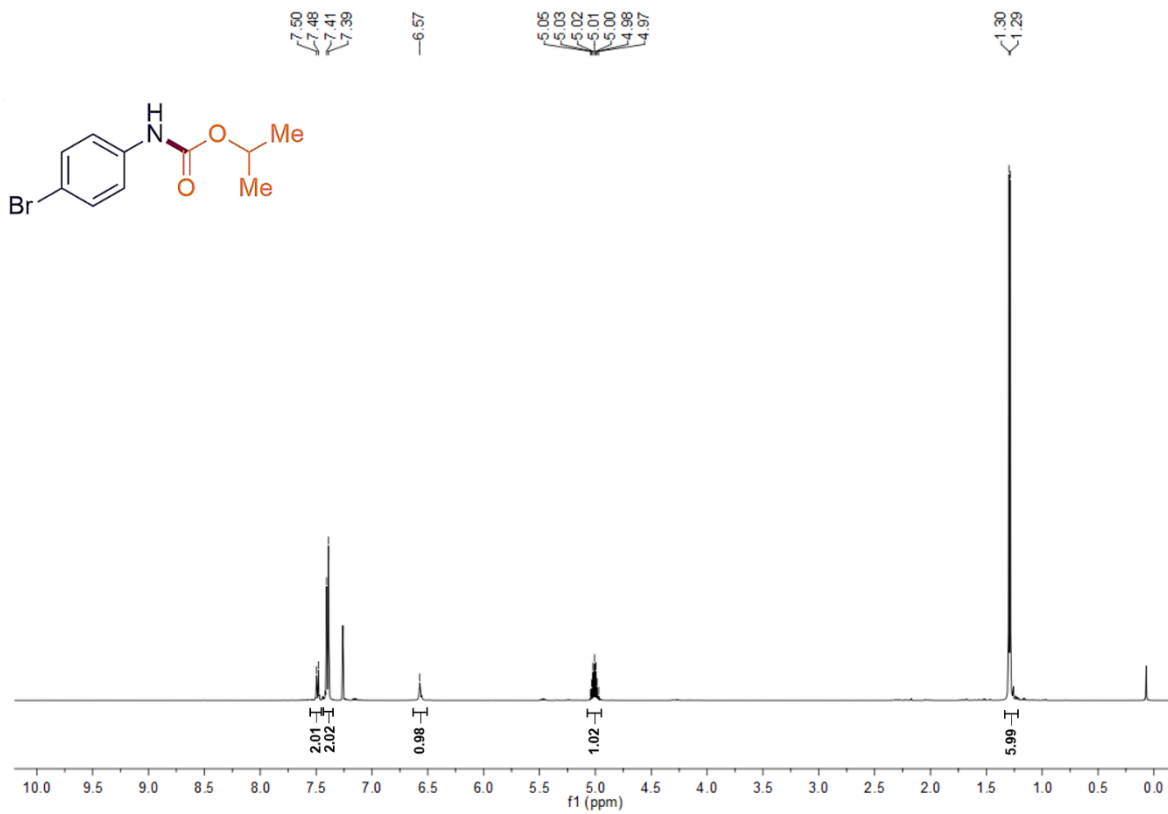

<sup>1</sup>H NMR spectrum of **3fa** (500 MHz, CDCl<sub>3</sub>)

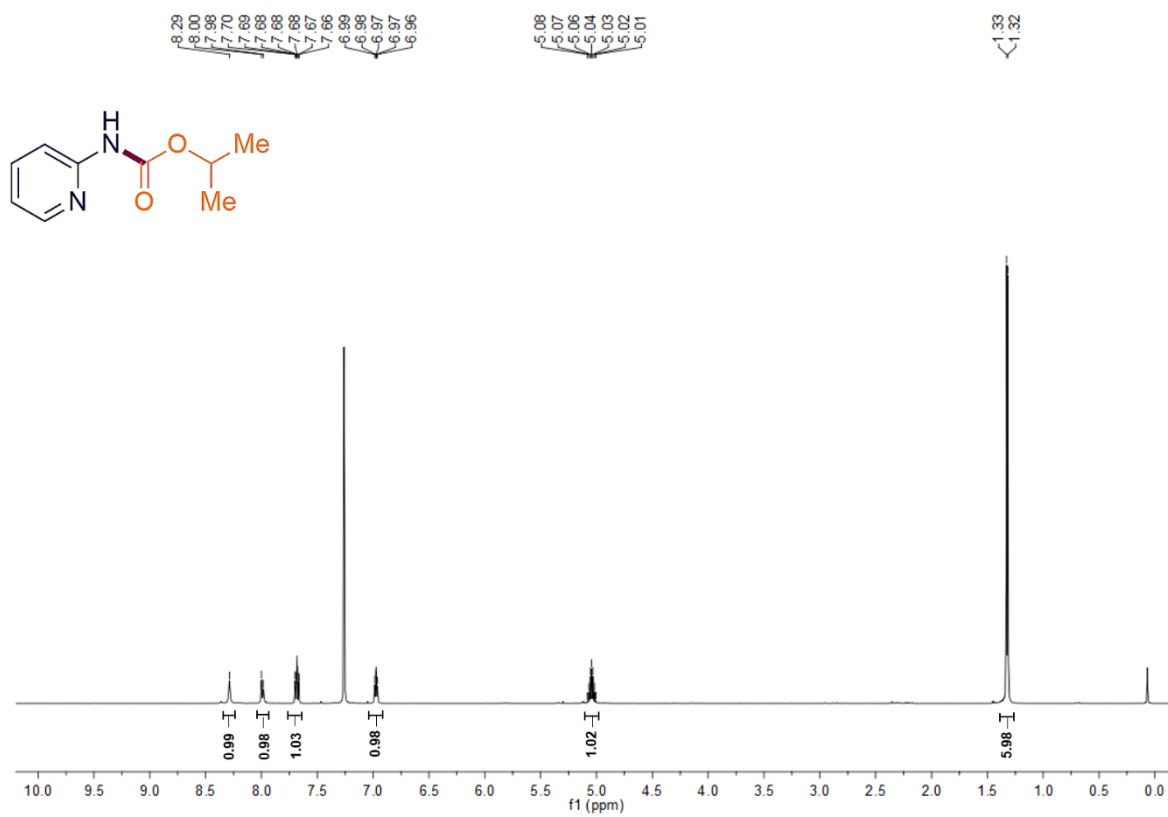

<sup>1</sup>H NMR spectrum of **3ga** (500 MHz, CDCl<sub>3</sub>)



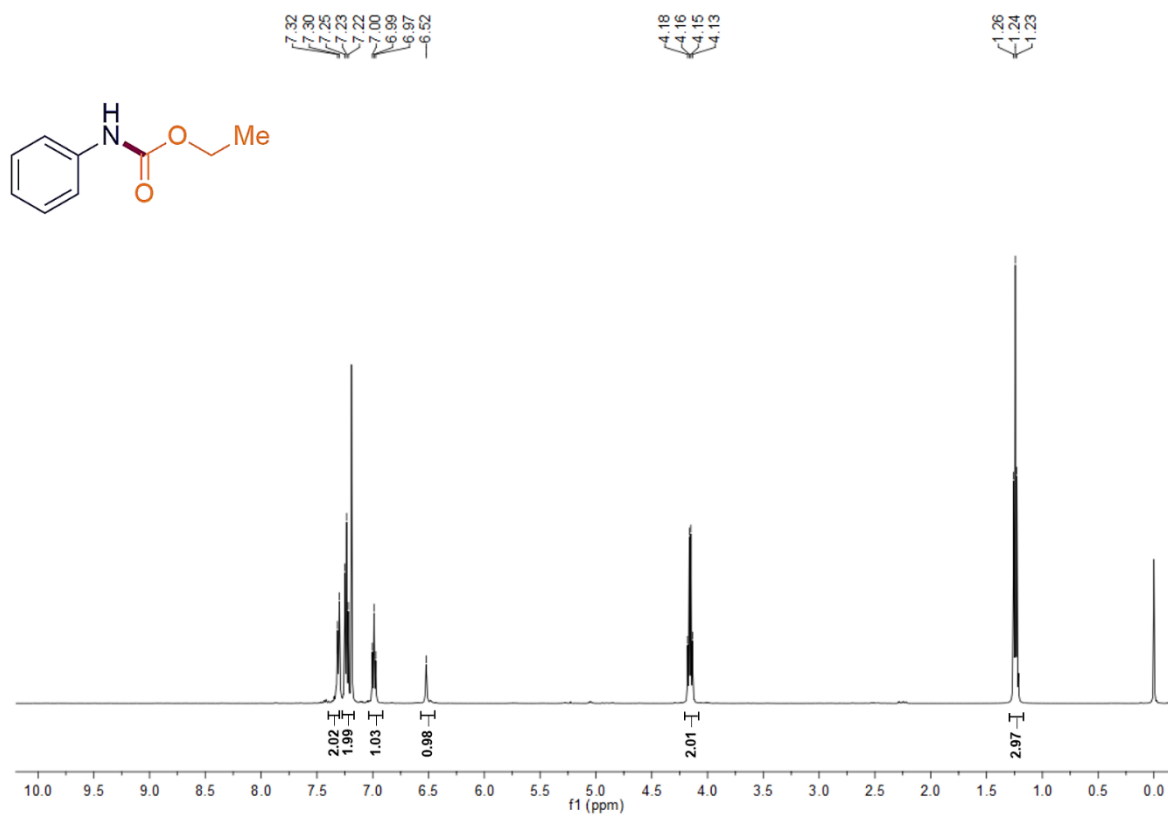

<sup>1</sup>H NMR spectrum of **3ab** (500 MHz, CDCl<sub>3</sub>)

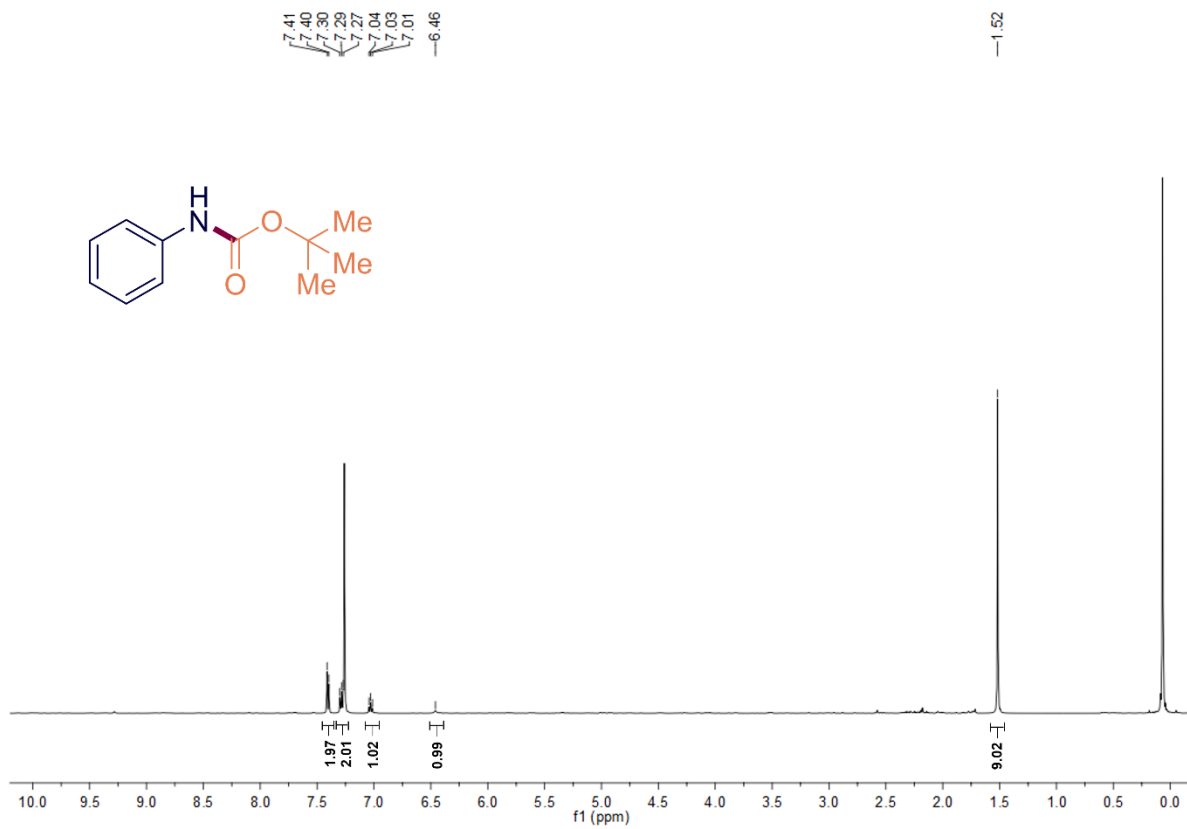

<sup>1</sup>H NMR spectrum of **3ac** (500 MHz, CDCl<sub>3</sub>)

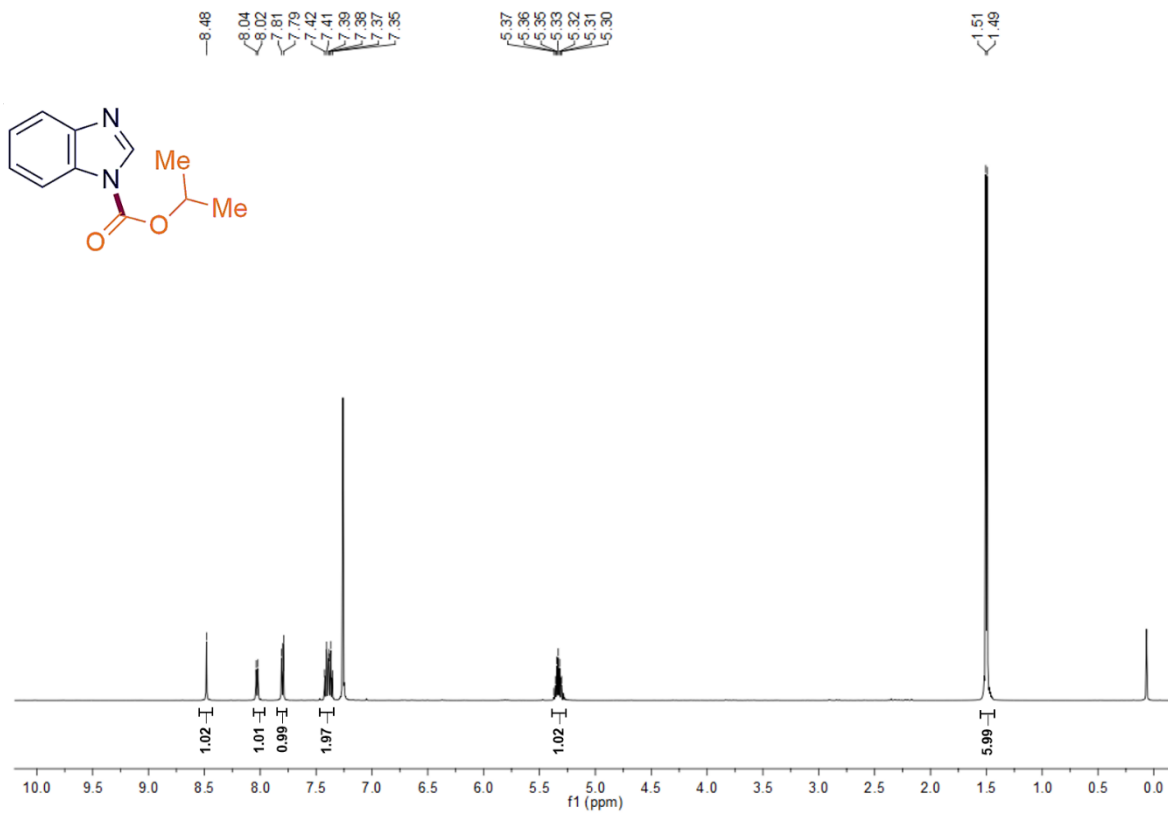

$^1\text{H}$  NMR spectrum of **4a** (500 MHz,  $\text{CDCl}_3$ )

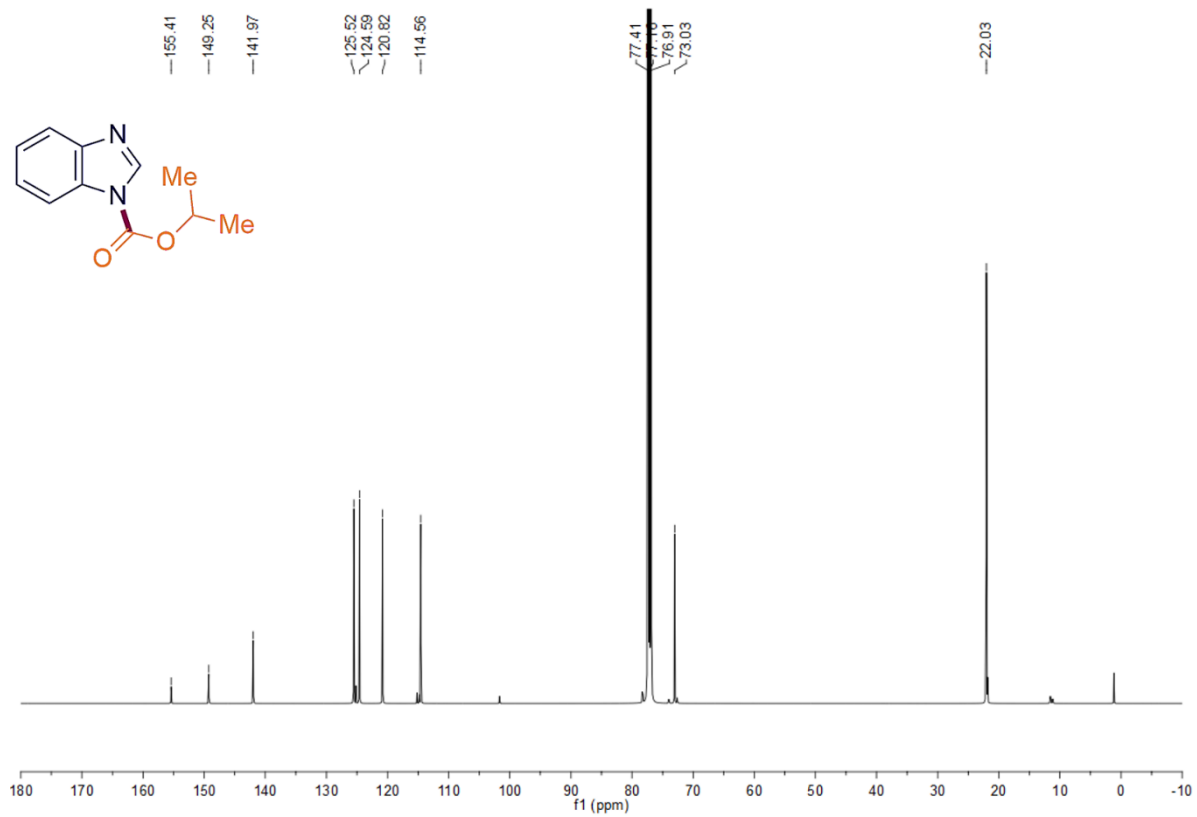

<sup>13</sup>C NMR spectrum of **4a** (126 MHz, CDCl<sub>3</sub>)

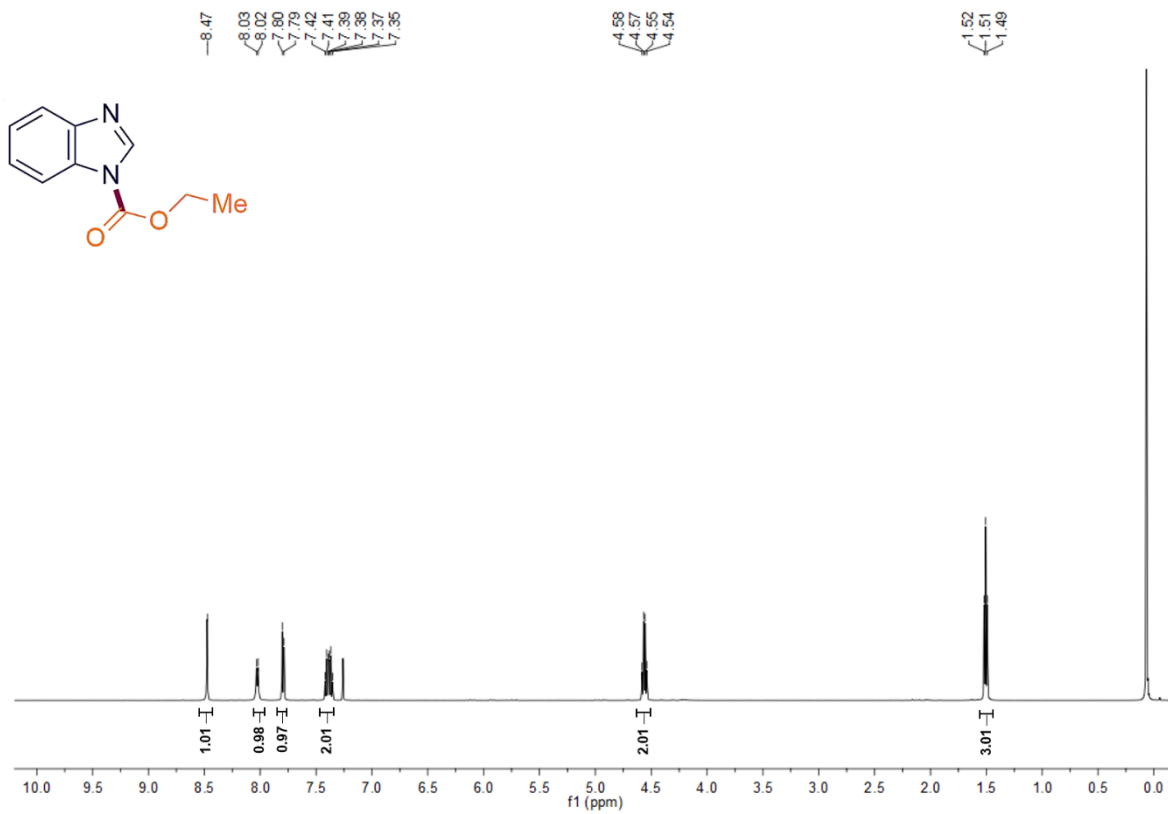

$^1\text{H}$  NMR spectrum of **4b** (500 MHz,  $\text{CDCl}_3$ )

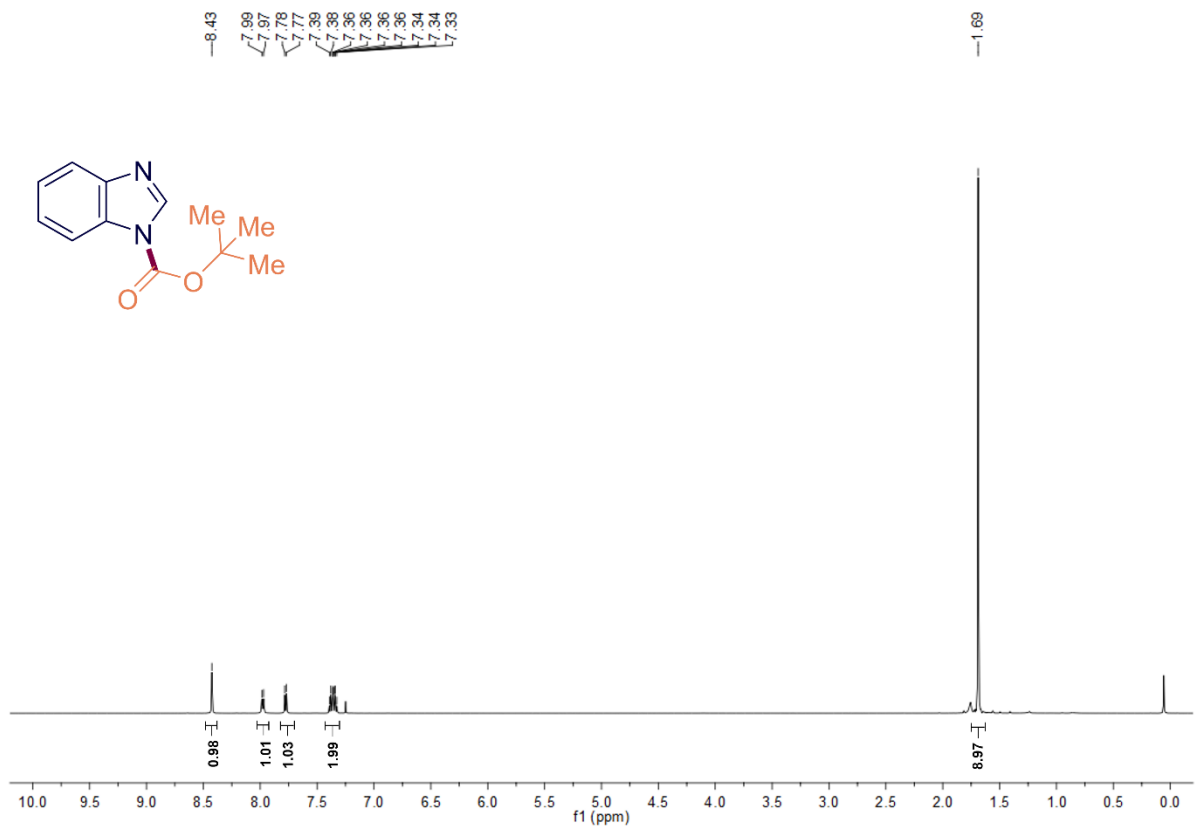

### XYZ coordinates of the optimized structure

|    |                 |                 |                 |
|----|-----------------|-----------------|-----------------|
| Cu | 0.328772000000  | -2.554967000000 | 0.596264000000  |
| Cu | -1.408021000000 | -1.460420000000 | 2.155710000000  |
| Cu | -2.124666000000 | -1.630052000000 | -0.157130000000 |
| Cu | 0.292739000000  | 2.337297000000  | 0.345288000000  |
| Cu | -2.112251000000 | 0.358012000000  | -1.832008000000 |
| Cu | 2.508751000000  | 1.018004000000  | -0.951908000000 |
| Cu | -1.756523000000 | 1.020784000000  | 0.926799000000  |
| Cu | 1.141007000000  | -3.915697000000 | -4.359359000000 |
| Cu | -2.247863000000 | -3.997712000000 | -1.156488000000 |
| Cu | 2.571756000000  | -2.873760000000 | 2.228661000000  |
| Cu | 1.246839000000  | -3.733960000000 | -1.640904000000 |
| Cu | 3.620967000000  | -1.287852000000 | 4.939237000000  |
| Cu | 0.207908000000  | -0.191542000000 | -0.313413000000 |
| Cu | -3.347351000000 | 0.195325000000  | 2.866200000000  |
| Cu | -3.053672000000 | 2.615537000000  | -0.689020000000 |
| Cu | -0.338665000000 | 0.069529000000  | -3.994478000000 |
| Cu | 2.971789000000  | 1.411537000000  | 2.820973000000  |
| Cu | 2.843605000000  | 3.379032000000  | 0.054841000000  |
| Cu | 2.212491000000  | 5.191412000000  | -2.601121000000 |
| Cu | 2.441990000000  | -1.402933000000 | -1.519268000000 |
| Cu | 2.449759000000  | -0.671941000000 | 0.904964000000  |
| Cu | -0.576377000000 | -1.750114000000 | -2.149319000000 |
| Cu | 0.459621000000  | 0.543155000000  | 2.169663000000  |

|    |                 |                 |                 |
|----|-----------------|-----------------|-----------------|
| Cu | -0.175225000000 | 1.870543000000  | -2.205362000000 |
| Cu | -4.688541000000 | -0.961191000000 | 0.174704000000  |
| Cu | -0.915588000000 | 4.412684000000  | -0.852632000000 |
| Cu | -5.424419000000 | 2.133654000000  | 0.404750000000  |
| Cu | 0.272319000000  | -1.231667000000 | 4.184045000000  |
| Cu | 2.818674000000  | 1.647928000000  | -3.518778000000 |
| Cl | -3.173942000000 | 4.920721000000  | -1.099986000000 |
| Cl | -5.532327000000 | -0.759654000000 | 2.404765000000  |
| Cl | -0.611263000000 | -5.272088000000 | -1.993702000000 |
| Cl | 4.344429000000  | 2.970665000000  | 1.887216000000  |
| Cl | 1.684918000000  | 0.725089000000  | -5.186119000000 |
| Cl | 1.382483000000  | -3.290641000000 | 4.321614000000  |
| S  | 3.916978000000  | -0.955888000000 | 2.707648000000  |
| S  | -0.471864000000 | -2.233768000000 | -4.446718000000 |
| S  | 1.336058000000  | 0.870822000000  | 4.343483000000  |
| S  | 1.960258000000  | -4.314110000000 | 0.576801000000  |
| S  | 0.339080000000  | 4.010199000000  | -2.865977000000 |
| S  | -3.579029000000 | 2.330721000000  | 1.847407000000  |
| S  | 0.967603000000  | 4.580274000000  | 0.577900000000  |
| S  | 3.995025000000  | 2.594933000000  | -1.852215000000 |
| S  | -4.150337000000 | -3.216012000000 | -0.232535000000 |
| S  | -4.462220000000 | 0.774144000000  | -1.398974000000 |
| S  | 2.939416000000  | -2.875255000000 | -3.195604000000 |
| S  | -2.028154000000 | -0.984567000000 | 4.397295000000  |



|   |                 |                 |                 |
|---|-----------------|-----------------|-----------------|
| P | -7.664093000000 | 1.960490000000  | 0.626297000000  |
| P | 4.041053000000  | 6.387133000000  | -2.083366000000 |
| P | 1.291666000000  | -6.075970000000 | -5.020103000000 |
| P | 3.127525000000  | -1.549561000000 | 7.109887000000  |
| C | 0.835472000000  | -5.565562000000 | 1.348217000000  |
| C | 4.363366000000  | -3.940963000000 | -2.691805000000 |
| C | -2.198188000000 | -2.872603000000 | -4.576367000000 |
| C | -4.101298000000 | -3.958026000000 | 1.459165000000  |
| C | -5.506612000000 | 0.836432000000  | -2.909610000000 |
| C | -2.897373000000 | 3.922966000000  | 2.462498000000  |
| C | -2.866643000000 | -2.605438000000 | 4.711360000000  |
| C | 0.114399000000  | 2.131284000000  | 4.919232000000  |
| C | 5.629174000000  | -1.045216000000 | 2.041777000000  |
| C | -0.578858000000 | 4.306628000000  | -4.430495000000 |
| C | 5.553167000000  | 1.695127000000  | -1.422391000000 |
| C | 0.861762000000  | 4.660122000000  | 2.420257000000  |
| C | -8.251122000000 | 0.327948000000  | 0.001423000000  |
| C | -8.772871000000 | 3.170408000000  | -0.211726000000 |
| C | -8.241963000000 | 1.965876000000  | 2.373886000000  |
| C | 5.520035000000  | 5.965874000000  | -3.091556000000 |
| C | 4.611887000000  | 6.160717000000  | -0.348845000000 |
| C | 3.868963000000  | 8.210793000000  | -2.257708000000 |
| C | 2.073615000000  | -7.132959000000 | -3.726836000000 |
| C | 2.289470000000  | -6.449797000000 | -6.525106000000 |

|   |                 |                 |                 |
|---|-----------------|-----------------|-----------------|
| C | -0.307470000000 | -6.929751000000 | -5.348704000000 |
| C | 1.364311000000  | -1.178170000000 | 7.481480000000  |
| C | 4.061104000000  | -0.538842000000 | 8.331182000000  |
| C | 3.330119000000  | -3.283496000000 | 7.688549000000  |
| H | 1.364154000000  | -6.519137000000 | 1.419431000000  |
| H | 0.552029000000  | -5.215080000000 | 2.341856000000  |
| H | -0.046862000000 | -5.671023000000 | 0.715600000000  |
| H | 4.523147000000  | -4.699158000000 | -3.461641000000 |
| H | 5.257668000000  | -3.319663000000 | -2.600578000000 |
| H | 4.148176000000  | -4.422948000000 | -1.736621000000 |
| H | -2.263073000000 | -3.823913000000 | -4.043332000000 |
| H | -2.873227000000 | -2.150402000000 | -4.111899000000 |
| H | -2.456994000000 | -3.013166000000 | -5.628393000000 |
| H | -3.114888000000 | -3.794292000000 | 1.897420000000  |
| H | -4.855982000000 | -3.458894000000 | 2.068790000000  |
| H | -4.308683000000 | -5.028323000000 | 1.392197000000  |
| H | -6.536718000000 | 1.067710000000  | -2.632629000000 |
| H | -5.118865000000 | 1.615260000000  | -3.568946000000 |
| H | -5.461429000000 | -0.132816000000 | -3.411193000000 |
| H | -2.283543000000 | 3.720088000000  | 3.341459000000  |
| H | -2.294682000000 | 4.377098000000  | 1.673437000000  |
| H | -3.719332000000 | 4.589627000000  | 2.730495000000  |
| H | -3.092757000000 | -2.676805000000 | 5.777878000000  |
| H | -3.789651000000 | -2.639390000000 | 4.130493000000  |

|   |                 |                 |                 |
|---|-----------------|-----------------|-----------------|
| H | -2.205208000000 | -3.422024000000 | 4.416701000000  |
| H | -0.225107000000 | 1.837932000000  | 5.915023000000  |
| H | 0.598202000000  | 3.108111000000  | 4.961016000000  |
| H | -0.735932000000 | 2.157104000000  | 4.236650000000  |
| H | 5.564800000000  | -0.921012000000 | 0.959366000000  |
| H | 6.218195000000  | -0.237830000000 | 2.479999000000  |
| H | 6.065282000000  | -2.014306000000 | 2.287824000000  |
| H | -1.575342000000 | 3.877041000000  | -4.311782000000 |
| H | -0.652413000000 | 5.378499000000  | -4.621954000000 |
| H | -0.055196000000 | 3.805843000000  | -5.247431000000 |
| H | 6.376540000000  | 2.124729000000  | -1.996651000000 |
| H | 5.719565000000  | 1.829178000000  | -0.351989000000 |
| H | 5.435638000000  | 0.635954000000  | -1.652321000000 |
| H | 0.878068000000  | 5.707118000000  | 2.730911000000  |
| H | -0.058450000000 | 4.180666000000  | 2.747886000000  |
| H | 1.721495000000  | 4.128123000000  | 2.833424000000  |
| H | -0.488406000000 | 1.884430000000  | 1.821669000000  |
| H | -1.489254000000 | 1.810873000000  | -0.723520000000 |
| H | -1.371099000000 | 1.178159000000  | -3.267336000000 |
| H | -2.216761000000 | -1.400559000000 | -1.871974000000 |
| H | 0.721711000000  | -1.774988000000 | -1.083635000000 |
| H | 3.436278000000  | -0.408099000000 | -0.519768000000 |
| H | 0.829099000000  | -0.976646000000 | 1.461011000000  |
| H | -1.256583000000 | -2.835375000000 | 1.105408000000  |

|   |                 |                 |                 |
|---|-----------------|-----------------|-----------------|
| H | -2.577533000000 | -0.470006000000 | 1.067696000000  |
| H | 0.876852000000  | 1.287763000000  | -0.957612000000 |
| H | -9.312701000000 | 0.177583000000  | 0.226207000000  |
| H | -7.657019000000 | -0.457968000000 | 0.476972000000  |
| H | -8.099642000000 | 0.271386000000  | -1.080410000000 |
| H | -9.825893000000 | 2.921699000000  | -0.039619000000 |
| H | -8.571039000000 | 3.163901000000  | -1.287438000000 |
| H | -8.571430000000 | 4.175155000000  | 0.172451000000  |
| H | -7.683628000000 | 1.198885000000  | 2.918686000000  |
| H | -9.315700000000 | 1.757013000000  | 2.435813000000  |
| H | -8.032893000000 | 2.941137000000  | 2.824411000000  |
| H | 6.394699000000  | 6.531619000000  | -2.753577000000 |
| H | 5.321862000000  | 6.195807000000  | -4.142796000000 |
| H | 5.717305000000  | 4.893907000000  | -2.999337000000 |
| H | 5.446070000000  | 6.835256000000  | -0.128319000000 |
| H | 4.938304000000  | 5.126718000000  | -0.204074000000 |
| H | 3.784564000000  | 6.355866000000  | 0.339426000000  |
| H | 3.602754000000  | 8.455811000000  | -3.290182000000 |
| H | 4.804959000000  | 8.714505000000  | -1.993926000000 |
| H | 3.069950000000  | 8.562735000000  | -1.598142000000 |
| H | 2.094796000000  | -8.184901000000 | -4.032305000000 |
| H | 1.507472000000  | -7.031229000000 | -2.796719000000 |
| H | 3.095933000000  | -6.786700000000 | -3.547081000000 |
| H | 2.321186000000  | -7.528262000000 | -6.716711000000 |

|   |                 |                 |                 |
|---|-----------------|-----------------|-----------------|
| H | 3.309037000000  | -6.076572000000 | -6.386721000000 |
| H | 1.849145000000  | -5.942321000000 | -7.388998000000 |
| H | -0.942850000000 | -6.834247000000 | -4.463681000000 |
| H | -0.150361000000 | -7.989532000000 | -5.577632000000 |
| H | -0.809442000000 | -6.446694000000 | -6.192854000000 |
| H | 1.153339000000  | -1.347698000000 | 8.542723000000  |
| H | 0.729160000000  | -1.828750000000 | 6.873113000000  |
| H | 1.144766000000  | -0.140048000000 | 7.219293000000  |
| H | 3.718345000000  | -0.749032000000 | 9.349834000000  |
| H | 3.912472000000  | 0.522789000000  | 8.111329000000  |
| H | 5.128696000000  | -0.765688000000 | 8.253476000000  |
| H | 2.738694000000  | -3.934660000000 | 7.038211000000  |
| H | 2.992072000000  | -3.390754000000 | 8.724650000000  |
| H | 4.382199000000  | -3.575254000000 | 7.616417000000  |

## References

- S1. O. V. Dolomanov, L. J. Bourhis, R. J. Gildea, J. A. Howard and H. Puschmann, *J. Appl. Crystallogr.*, 2009, **42**, 339-341.
- S2. G. M. Sheldrick, *Acta Crystallogr. Sec. C: Struc. Chem.*, 2015, **71**, 3-8.
- S3. G. M. Sheldrick, *Acta Crystallogr. Sec. A: Found. Adv.*, 2015, **71**, 3-8.
- S4. A. L. Spek, *Acta Crystallogr. Sec. C: Struc. Chem.*, 2015, **71**, 9-18.
- S5. C. Dong, R.-W. Huang, C. Chen, J. Chen, S. Nematulloev, X. Guo, A. Ghosh, B. Alamer, M. N. Hedhili, T. T. Isimjan, Y. Han, O. F. Mohammed and O. M. Bakr, *J. Am. Chem. Soc.*, 2021, **143**, 11026-11035.
- S6. J. P. Perdew, J. A. Chevary, S. H. Vosko, K. A. Jackson, M. R. Pederson, D. J. Singh and C. Fiolhais, *Phys. Rev. B*, 1992, **46**, 6671.
- S7. G. Kresse and J. Furthmüller, *Comput. Mater. Sci.*, 1996, **6**, 15-50.
- S8. G. Kresse, J. Furthmüller and J. Hafner, *Phys. Rev. B*, 1994, **50**, 13181.
- S9. P. E. Blöchl, *Phys. Rev. B*, 1994, **50**, 17953.
- S10. M. Frisch, G. Trucks, H. Schlegel, G. Scuseria, M. Robb, J. Cheeseman, G. Scalmani, V. Barone, B. Mennucci and G. Petersson, *Wallingford, CT* 2009, **32**, 5648-5652.
- S11. A. D. Becke, *J. Chem. Phys.*, 1993, **98**, 5648-5652.
- S12. A. McLean and G. Chandler, *J. Chem. Phys.*, 1980, **72**, 5639-5648.
- S13. P. J. Hay and W. R. Wadt, *J. Chem. Phys.*, 1985, **82**, 270-283.
- S14. W. R. Wadt and P. J. Hay, *J. Chem. Phys.*, 1985, **82**, 284-298.
- S15. M. Usman, Z.-H. Ren, Y.-Y. Wang and Z.-H. Guan, *RSC Adv.*, 2016, **6**, 107542-107546.
- S16. N. V. Reddy, K. R. Prasad, P. S. Reddy, M. L. Kantam and K. R. Reddy, *Org. Biomol. Chem.*, 2014, **12**, 2172-2175.
- S17. N. Uhlig and C. J. Li, *Chem. Eur. J.*, 2014, **20**, 12066-12070.
- S18. S. Majumdar, J. De, A. Chakraborty and D. K. Maiti, *RSC Adv.*, 2014, **4**, 24544-24550.
